# Supplementary material for: A cationic gold-fluorenyl complex with a dative Au → C+ bond: synthesis, structure, and carbophilic reactivity
Source: Royal Society of Chemistry journal article supplement (doi:10.1039/d2cc05436a), 2022-11-28
Supplement: d2cc05436a1.pdf [file d2cc05436a1.pdf]

# A cationic gold-fluorenyl complex with a dative Au→C<sup>+</sup> bond: Synthesis, structure, and carbophilic reactivity.

Elishua D. Litle and François P. Gabbaï

Department of Chemistry, Texas A&M University, College Station, Texas 77843-3255

## Supporting Information

### Table of Contents

|                                                                  |    |
|------------------------------------------------------------------|----|
| 1 Experimental .....                                             | 2  |
| 1.1 General experimental.....                                    | 2  |
| 1.2 Syntheses .....                                              | 2  |
| 2 NMR spectra .....                                              | 5  |
| 2.1 NMR spectra of products .....                                | 5  |
| 2.2 Catalytic studies .....                                      | 19 |
| 3 Computational studies.....                                     | 20 |
| 3.1 General methods.....                                         | 20 |
| 3.2 Geometry optimized structures .....                          | 20 |
| 3.3 Pipek-Mezey orbitals.....                                    | 24 |
| 3.5 Cartesian coordinates of geometry optimized structures ..... | 27 |
| 4 X-ray diffraction analysis .....                               | 33 |
| 4.1 Experimental details.....                                    | 33 |
| 4.2 Table showing CCDC numbers.....                              | 33 |
| 5 References.....                                                | 34 |

# 1 Experimental

## 1.1 General experimental

All reactions and manipulations were carried out under an atmosphere of dry, O<sub>2</sub>-free nitrogen using standard a double-manifold or a nitrogen-filled glove box. All solvents were dried by passing through an alumina column (pentane and CH<sub>2</sub>Cl<sub>2</sub>) or by refluxing under N<sub>2</sub> over Na/K (Et<sub>2</sub>O and THF). Deuterated solvents were distilled and/or dried over molecular sieves before use. Chemicals were purchased from commercial suppliers and used as received. 2-Bromophenyl-diphenylphosphine was synthesized as described in the literature.<sup>1</sup> <sup>1</sup>H, <sup>13</sup>C, <sup>11</sup>B, <sup>19</sup>F and <sup>31</sup>P NMR spectra were recorded on a Bruker Avance II 400. Chemical shifts are expressed as parts per million (ppm, δ) downfield of tetramethylsilane (TMS) and are referenced to CDCl<sub>3</sub> (7.26/77.16 ppm) as internal standards. NMR spectra were referenced to CFCl<sub>3</sub> (<sup>19</sup>F), BF<sub>3</sub>·Et<sub>2</sub>O/CDCl<sub>3</sub> (<sup>11</sup>B) and H<sub>3</sub>PO<sub>4</sub> (<sup>31</sup>P). All coupling constants are absolute values and are expressed in Hertz (Hz). Mass spectrometry analyses were performed in-house at the Center for Mass Spectrometry. Elemental analyses were performed by Atlantic Microlab (Norcross, GA).

## 1.2 Syntheses

### Synthesis of **1**

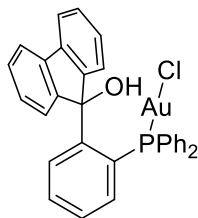

2-Bromophenyl-diphenylphosphine (500 mg, 1.46 mmol) was dissolved in Et<sub>2</sub>O (20 mL), cooled to -78 °C and treated with *n*-butyllithium (2.5 M hexanes, 0.7 mL, 1.76 mmol, 1.2 equiv.). The resulting mixture was stirred at low temperature for 2 hours. To this cooled solution, freshly recrystallized fluorenone (290 mg, 1.61 mmol, 1.1 equiv.) was added as a solid. The resulting mixture was stirred and allowed to slowly warm to ambient temperature at which point a yellow/orange precipitate became visible. After stirring for a further 18 h, the reaction was quenched by addition of water. The aqueous phase was then extracted with Et<sub>2</sub>O (3 x 20 mL) and the organic fractions were combined, dried over MgSO<sub>4</sub>, and evacuated to dryness to afford a yellow residue. This residue was triturated in pentane, yielding a white powdery solid which was isolated by filtration and washed with a small amount of acetonitrile (1 mL) to yield 318 mg of impure LOH (Figure S1). A portion of this impure product (100 mg) was dissolved in CH<sub>2</sub>Cl<sub>2</sub> (3 mL) and combined with (tbt)AuCl (81 mg, 0.25 mmol). The resulting solution was stirred vigorously for 15 mins leading to the appearance of a white precipitate, which was augmented by addition of pentane (10 mL) to the solution. The precipitate was isolated by filtration, washed with pentane (3 x 3 mL) and dried *in vacuo* to yield the **1** (71 mg, 42% yield).

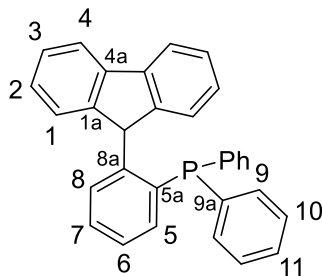

<sup>1</sup>H NMR (400 MHz, CDCl<sub>3</sub>, 298 K) δ/ppm: 7.75 – 7.64 (m, 4H, H-9), 7.62 (d, <sup>2</sup>J<sub>HH</sub> = 7.5 Hz, 2H, H-4 or H-1), 7.55 – 7.47 (m, 8H, H-10, H-11 and H-1 or H4), 7.36 (td, <sup>2</sup>J<sub>HH</sub> = 7.5, <sup>3</sup>J<sub>HH</sub> = 1.2 Hz, 2H,

H-2 or H-3), 7.29 – 7.22 (m, 2H, H-2 or H-3), 7.14 (tt,  $^2J_{HH} = 7.6$  Hz,  $^3J_{HH} = 1.7$  Hz, 1H, H-6), 7.09 (tt,  $^2J_{HH} = 7.3$  Hz,  $^3J_{HH} = 1.6$  Hz, 1H, H-7), 6.89 (ddd,  $^3J_{HP} = 13.9$  Hz,  $^2J_{HH} = 7.9$  Hz,  $^3J_{HH} = 1.6$  Hz, 1H), 6.62 (ddd,  $^2J_{HH} = 7.7$  Hz,  $^4J_{HP} = 5.0$  Hz,  $^3J_{HH} = 1.6$  Hz, 1H, H-8), 2.65 (s, 1H, O-H).  **$^{13}\text{C}$  NMR** (126 MHz,  $\text{CDCl}_3$ , 298 K)  $\delta$ /ppm: 151.16 (s, C-1a or C-4a), 147.98 (d,  $J = 7.7$  Hz, C-9a), 139.29 (s, C-1a or C-4a), 135.21 (d,  $J = 8.4$  Hz, C-5), 134.19 (d,  $J = 14.2$  Hz, C-9), 133.50 (s, C-10 or C-11), 133.00 (s, C-10 or C-11), 131.21 (d,  $J = 2.3$  Hz, C-7), 130.36 (d,  $J = 8.9$  Hz, C-8), 129.55 (s, C-2 or C-3), 129.08 (s, C-10 or C-11), 128.99 (s, C-10 or C-11), 128.85 (s, C-2 or C-3), 127.25 (d,  $J = 9.9$  Hz, C-6), 126.27 (s, C-10 or C-11), 125.83 (s, C-16 or C-17), 125.70 (s, C-10 or C-11), 120.16 (s, C-1 or C-4), 87.09 (s, C-OH).  **$^{31}\text{P}$  NMR** (162 MHz,  $\text{CD}_3\text{CN}$ , 298 K)  $\delta$ /ppm: 38.52 (s). **HRMS** (ESI<sup>+</sup>)  $m/z$  calculated for  $[\text{M}+\text{NH}_4]^+$   $[\text{C}_{31}\text{H}_{23}\text{AuClOP}]\text{NH}_4^+$ : 692.1179, found: 692.1164. Because this compound was not used as a catalyst, we did not collect elemental analysis. The connectivity of LOH and **1** was confirmed by X-ray diffraction (see structure deposited in the Cambridge structural database under CCDC numbers 2172689 for LOH and 2172690 for **1**).

### Synthesis of **[2][BF<sub>4</sub>]**

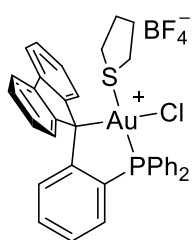

Compound **[2][BF<sub>4</sub>]** was synthesized by combining LOH (30.0 mg) and (tth)AuCl (21.8 mg, 0.068 mmol) in  $\text{CH}_2\text{Cl}_2$  (1 mL) at room temperature followed by addition, after 15 min, of  $\text{HBF}_4$  (52% w/w in  $\text{Et}_2\text{O}$ , 0.05 mL). Addition of  $\text{Et}_2\text{O}$  (5 mL) to the resulting solution led to the precipitation of a yellow powder which was isolated by filtration, washed with  $\text{Et}_2\text{O}$  (1 mL x 3) and dried *in vacuo* to yield **[2][BF<sub>4</sub>]** (40.9 mg, yield 72.4%).  **$^1\text{H}$  NMR** (400 MHz,  $\text{CDCl}_3$ , 298 K)  $\delta$ /ppm: 7.99 – 7.86 (m, 6H, H-9 and H-4), 7.87 – 7.71 (m, 6H, H-10 and H-11), 7.64 – 7.52 (m, 2H, H-6 or H-7 and H-5), 7.50 (td,  $^2J_{HH} = 7.5$  Hz,  $^3J_{HH} = 1.0$  Hz, 2H, H-6 or H-7), 7.42 (tdd,  $^2J_{HH} = 6.8$  Hz,  $^4J_{HP} = 3.6$  Hz,  $^3J_{HH} = 1.5$  Hz, 1H, H-6 or H-7), 7.36 (td,  $^2J_{HH} = 7.5$  Hz,  $^3J_{HH} = 1.1$  Hz, 2H, H-2 or H-3), 7.08 (d,  $^2J_{HH} = 7.6$  Hz, 2H, H-1), 6.57 (dd,  $^2J_{HH} = 8.1$  Hz,  $^4J_{HP} = 3.4$  Hz, 1H, H-8), 3.13 (br s, 2H, tht), 2.34 (br s, 2H, tht), 2.12 – 1.77 (m, 4H, tht).  **$^{13}\text{C}$  NMR** (126 MHz,  $\text{CDCl}_3$ , 298 K)  $\delta$ /ppm: 153.86 (d,  $J = 26.2$  Hz), 150.83 (s), 147.91 (d,  $J = 2.0$  Hz), 140.64 (s), 139.52 (s), 135.74 (s), 134.41 (d,  $J = 11.8$  Hz), 133.94 (s), 132.60 (s), 130.55 (d,  $J = 13.1$  Hz), 130.38 (s), 129.89 (d,  $J = 12.9$  Hz), 129.43 (s), 128.68 (s), 127.84 (s), 126.61 (s), 125.74 (s), 124.71 (s), 124.17 (s), 121.15 (s), 88.16 (d,  $J = 7.2$  Hz), 39.13 (s), 30.53 (s).  **$^{31}\text{P}$  NMR** (162 MHz,  $\text{CD}_3\text{CN}$ , 298 K)  $\delta$ /ppm: 69.6 (s). **Elemental Analysis** of  $\text{C}_{35}\text{H}_{30}\text{AuBClF}_4\text{BPS}$  calculated: C: 50.47, H: 3.63, found: C: 50.79, H: 3.73.

### Synthesis of **3**

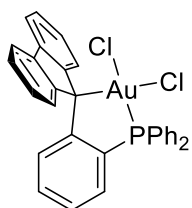

Compound **3** was synthesized by subsequent addition of HCl (1 N in  $\text{Et}_2\text{O}$ , 1.0 mL) and trifluoroacetic anhydride (1 mL) to **1** (38.0 mg, 0.056 mmol) dissolved in  $\text{CH}_2\text{Cl}_2$  (3 mL). The resulting solution was stirred for 15 min, concentrated to 1 mL and combined with  $\text{Et}_2\text{O}$  to yield a yellow precipitate. The precipitate was isolated by filtration, washed with  $\text{Et}_2\text{O}$  (1 mL x 3) and dried *in vacuo* to yield **3** (23.0 mg, 59%).  **$^1\text{H}$  NMR** (400 MHz,  $\text{CDCl}_3$ , 298 K)  $\delta$ /ppm: 8.02 – 7.94 (m, 4H, H-9), 7.81 (dd,  $^2J_{HH} = 7.6$ ,  $^3J_{HH} = 0.9$  Hz, 2H, H-4), 7.76 – 7.69 (m, 2H, H-11), 7.67 – 7.63 (m, 4H, H-10), 7.53 – 7.43 (m, 1H, H-5), 7.41 – 7.33 (m, 3H, H-2 or H-3 and H-6 or H-7), 7.33 – 7.28 (m, 1H, H-6 or H-7), 7.18 (td,  $^2J_{HH} = 7.5$  Hz,  $^3J_{HH} = 1.1$  Hz, 2H, H-2 or H-3), 6.97 (d,  $^2J_{HH} = 7.5$  Hz, 2H, H-1), 6.58 (dd,  $^2J_{HH} = 7.9$  Hz,  $^3J_{HH} = 3.0$  Hz, 1H, H-8).  **$^{13}\text{C}$  NMR** (126 MHz,  $\text{CDCl}_3$ , 298 K)  $\delta$ /ppm:

156.75 (d,  $J = 27.5$  Hz), 150.86 (s), 140.65 (s), 134.70 (s,  $J = 2.71$ ), 134.40 (d,  $J = 11.4$  Hz), 133.91 (d,  $J = 3.3$  Hz), 131.78 (d,  $J = 4.3$  Hz), 131.12 (s), 130.60 (s), 130.10 (d,  $J = 19.2$  Hz), , 129.88 (d,  $J = 12.8$  Hz), 129.71 (d,  $J = 8.9$  Hz), 128.68 (s), 127.82 (s), 126.03 (s), 125.74 (s), 125.48 (s), 120.54 (s), 85.61 (d,  $J = 7.3$  Hz).  $^{31}\text{P}$  NMR (162 MHz,  $\text{CD}_3\text{CN}$ , 298 K)  $\delta/\text{ppm}$ : 62.2 (s).

**Elemental Analysis** of  $\text{C}_{31}\text{H}_{22}\text{AuCl}_2\text{P}$  calculated: C: 53.70, H: 3.20, found: C: 53.98, H: 3.32.

#### Synthesis of $[\mathbf{4}_2][\text{BArF}_{24}]_2$

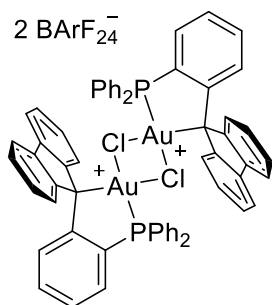

Compound  $[\mathbf{4}_2][\text{BArF}_{24}]_2$  was synthesized by combining  $\text{NaBArF}_{24}$  ( $\text{BArF}_{24} = \text{B}(3,5\text{-C}_6\text{H}_3(\text{CF}_3)_2)_4$ ) (83.1 mg, 0.094 mmol) and **3** (65.0 mg, 0.094 mmol) in *o*-difluorobenzene (2 mL). After being stirred briefly, the resulting orange solution was cooled to  $-40$  °C and layered with hexanes (15 mL). Dark orange/red crystals suitable for X-ray diffraction formed over a period of 5 days at  $-40$  °C. These crystals were isolated and analyzed to yield complex  $[\mathbf{4}_2][\text{BArF}_{24}]_2$  (106.1 mg, 67.4%).  $^1\text{H}$  NMR (400 MHz,  $\text{CD}_2\text{Cl}_2$ , 298 K)  $\delta/\text{ppm}$ : 7.79 (td,  $J = 6.7, 3.2$  Hz, 2H), 7.75 – 7.69 (m, 8H, Counter anion), 7.70 – 7.46 (m, 14H), 7.44 (dd,  $J = 8.1, 7.0$  Hz, 2H), 7.24 – 7.14 (m, 2H), 7.14 – 7.05 (m, 3H), 6.88 (d,  $J = 7.6$  Hz, 2H), 6.79 (dd,  $J = 7.9, 3.4$  Hz, 1H).  $^{13}\text{C}$  NMR (126 MHz,  $\text{CD}_2\text{Cl}_2$ , 233 K)  $\delta/\text{ppm}$ : 161.76 (dd,  $J = 99.5, 49.7$  Hz), 151.26 (s), 150.32 (s), 149.17 (s), 144.71 (s), 140.77 (s), 136.18 (s), 135.41 (s), 134.68 (s), 134.07 (s), 133.77 (s), 133.63 (s), 130.96 (s), 130.59 (s), 129.68 (s), 129.16 – 128.20 (m), 127.54 (s), 126.56 (s), 128.03 – 120.83 (m), 124.33 (s), 122.08 (s), 121.53 (s), 117.91 (s), 117.26 (s), 116.84 (s), 102.39 (s).  $^{31}\text{P}$  NMR (162 MHz,  $\text{CD}_2\text{Cl}_2$ , 298 K)  $\delta/\text{ppm}$ : 73.8 (s). The VT NMR measurement suggests that the spectra correspond to  $[\mathbf{4}][\text{BArF}_{24}]$ . **Elemental Analysis** of  $\text{C}_{126}\text{H}_{68}\text{Au}_2\text{B}_2\text{Cl}_2\text{F}_{48}\text{P}_2 + 2\text{NaCl}$  calculated: C: 47.91, H: 2.17, found: C: 48.10, H: 2.14. The purification protocol did not involve a step during which NaCl was separated.

## 2 NMR spectra

### 2.1 NMR spectra of products

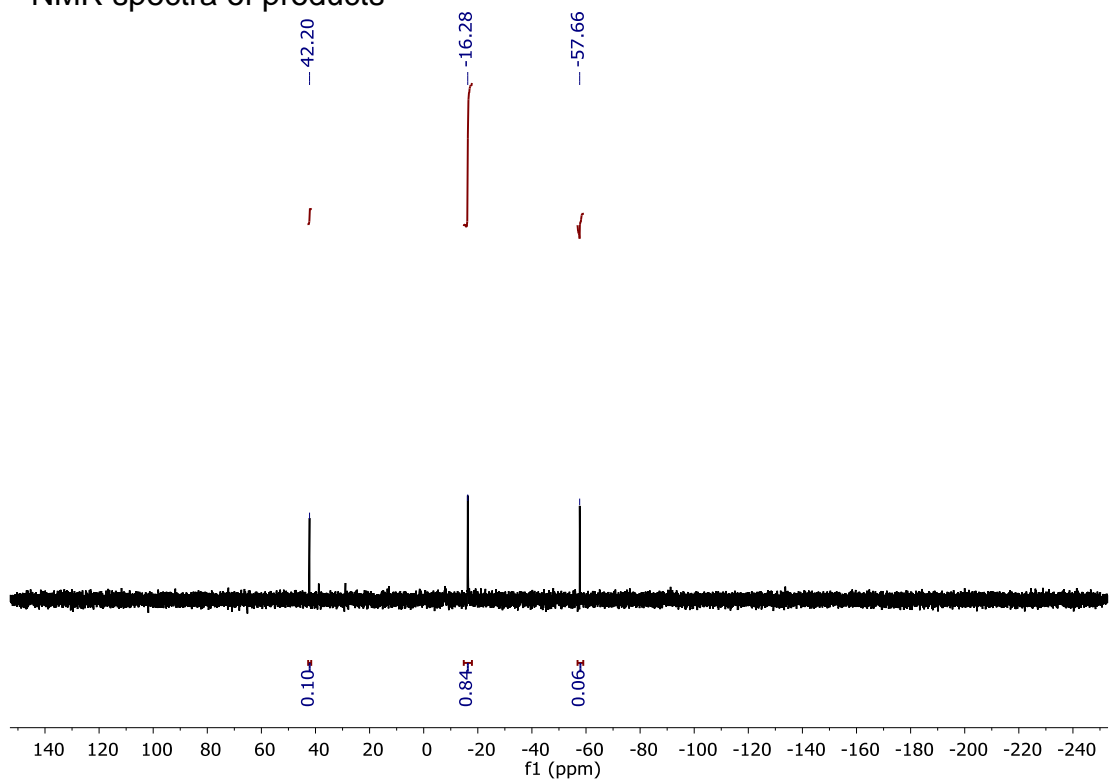

Figure S1.  $^{31}\text{P}$  NMR (400 MHz,  $\text{CD}_3\text{CN}$ , 298 K) spectrum of crude LOH.

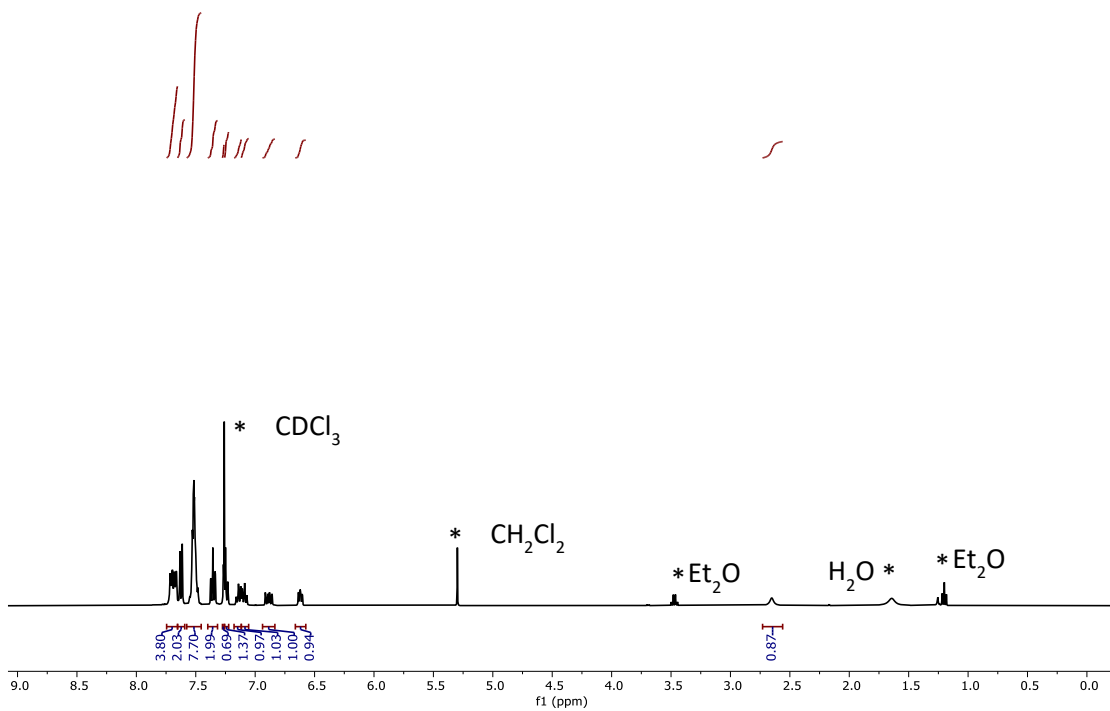

Figure S2.  $^1\text{H}$  NMR (400 MHz,  $\text{CD}_3\text{CN}$ , 298 K) spectrum of **1**

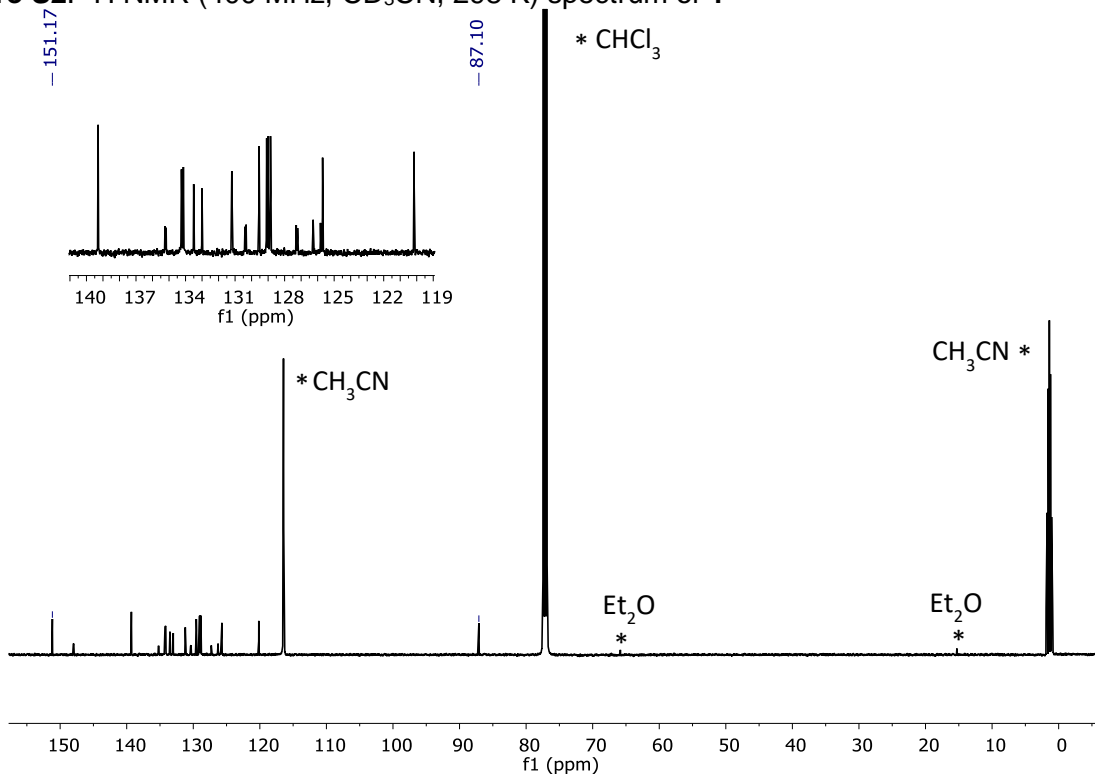

Figure S3.  $^{13}\text{C}$  NMR (126 MHz,  $\text{CDCl}_3$ , 298 K) spectrum of **1**

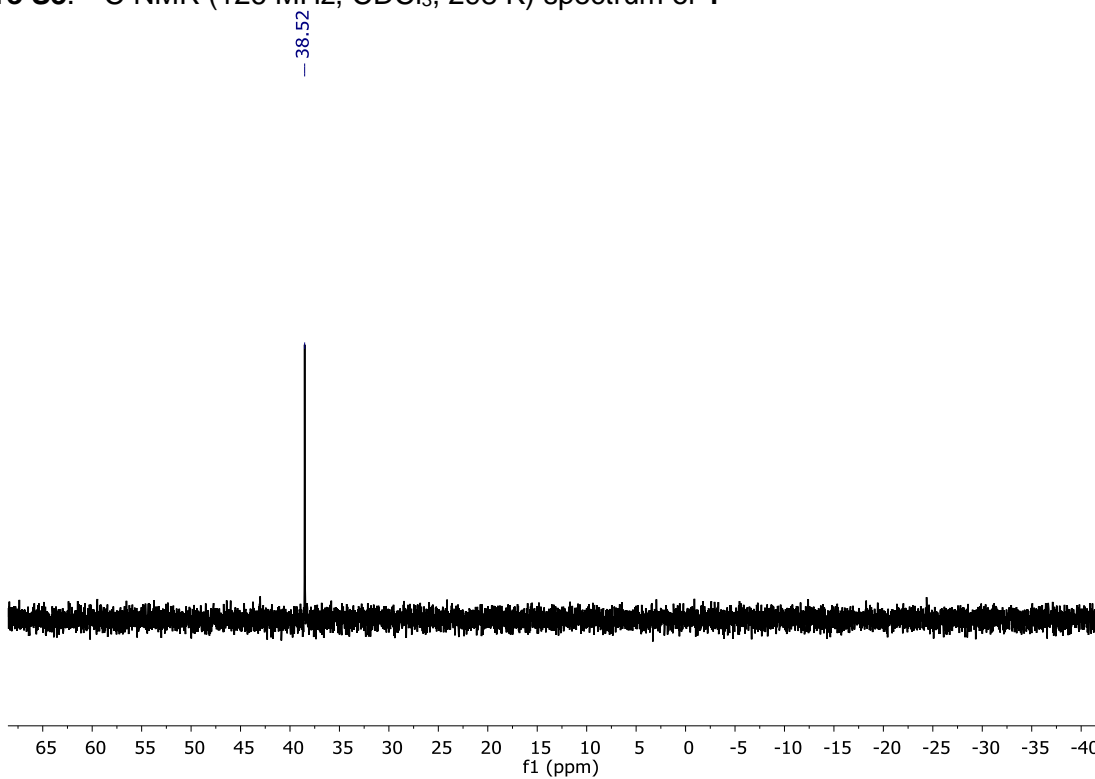

Figure S4.  $^{31}\text{P}$  NMR (162 MHz,  $\text{CD}_3\text{CN}$ , 298 K) spectrum of **1**

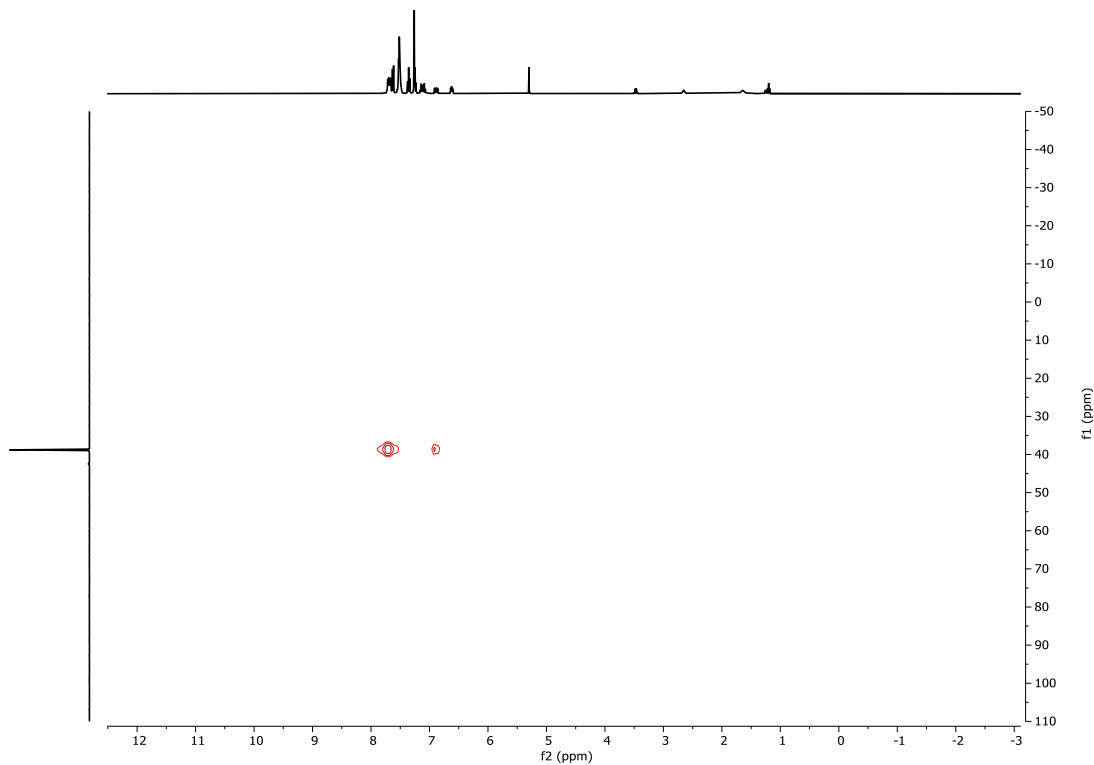

**Figure S5.** 2D- $^1\text{H}$ ,  $^{31}\text{P}$ -HSQC NMR (162 MHz,  $\text{CDCl}_3$ , 298 K) spectrum of **1**. Both the  $^1\text{H}$  and  $^{31}\text{P}$  spectra are external projections.

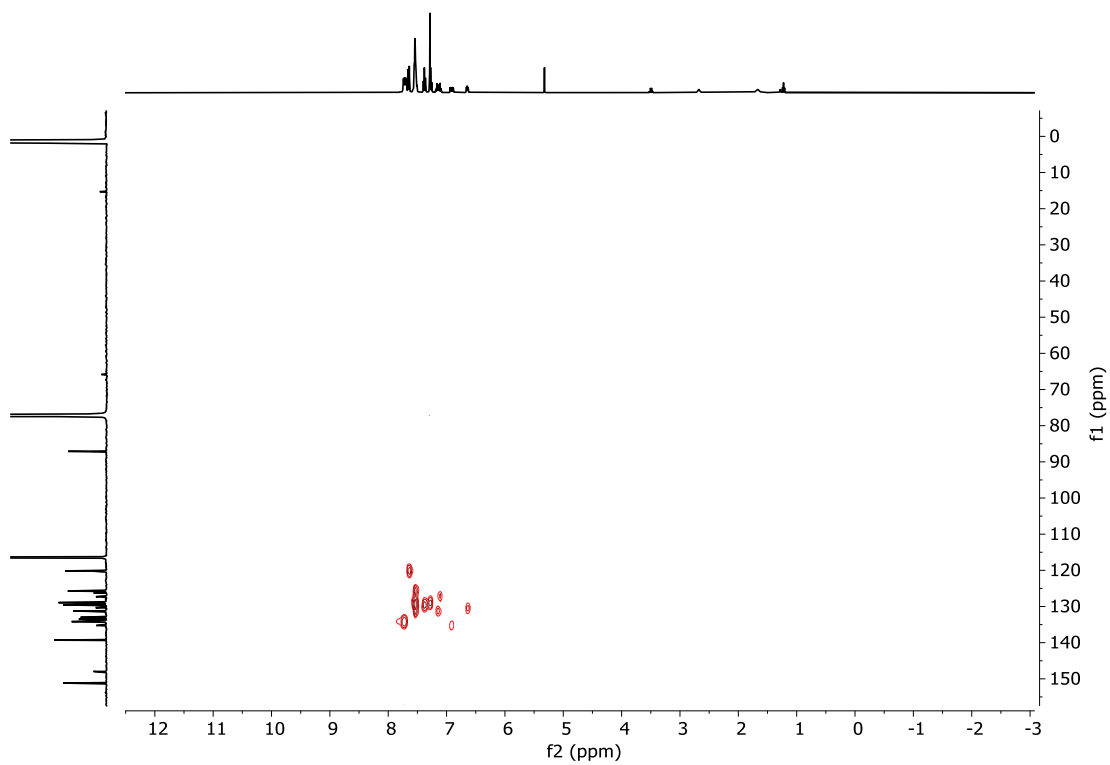

**Figure S6.** 2D- $^1\text{H}$ ,  $^{13}\text{C}$ -HSQC NMR (162 MHz,  $\text{CDCl}_3$ , 298 K) spectrum of **1**. Both the  $^1\text{H}$  and  $^{13}\text{C}$  spectra are external projections.

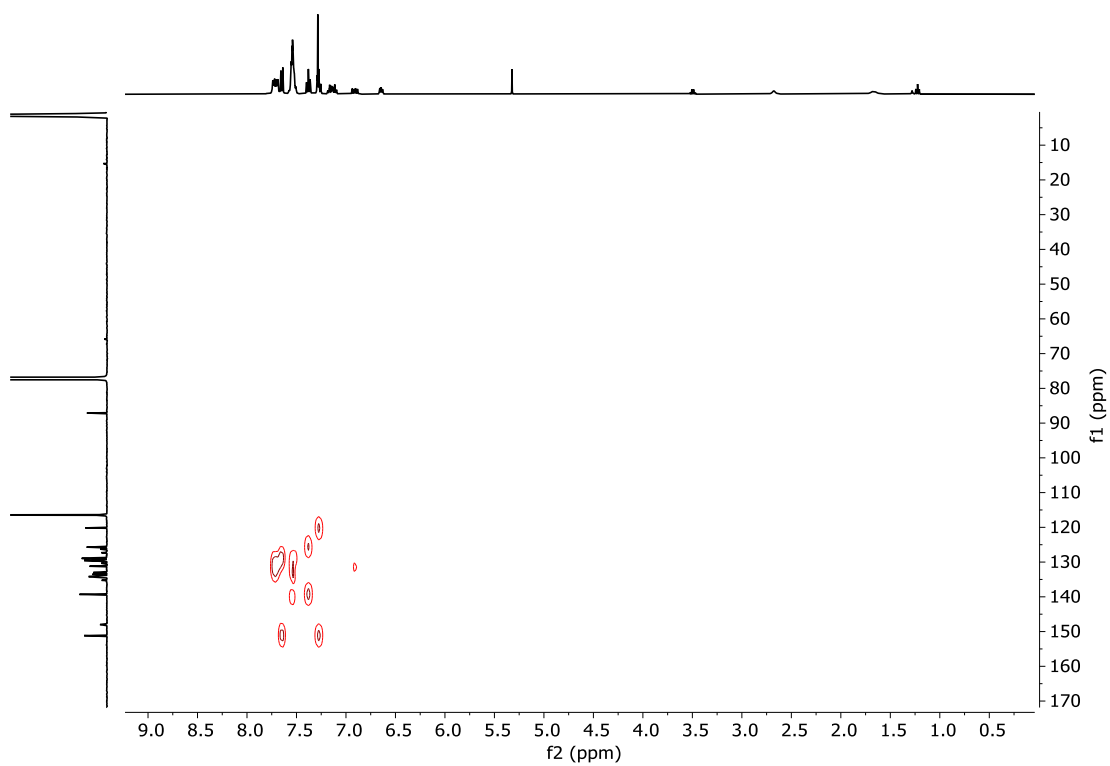

**Figure S7.** 2D- $^1\text{H}$ ,  $^{13}\text{C}$ -HMBC NMR (162 MHz,  $\text{CDCl}_3$ , 298 K) spectrum of **1**. Both the  $^1\text{H}$  and  $^{13}\text{C}$  spectra are external projections.

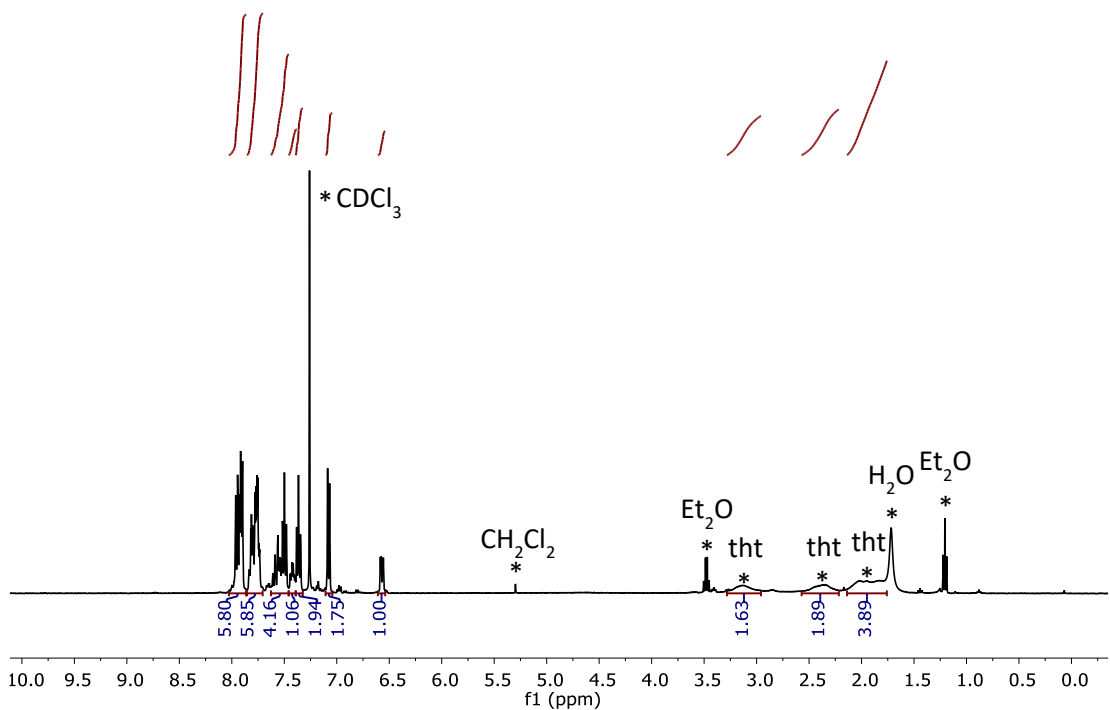

**Figure S8.**  $^1\text{H}$  NMR (400 MHz,  $\text{CDCl}_3$ , 298 K) spectrum of **[2][BF<sub>4</sub>]**



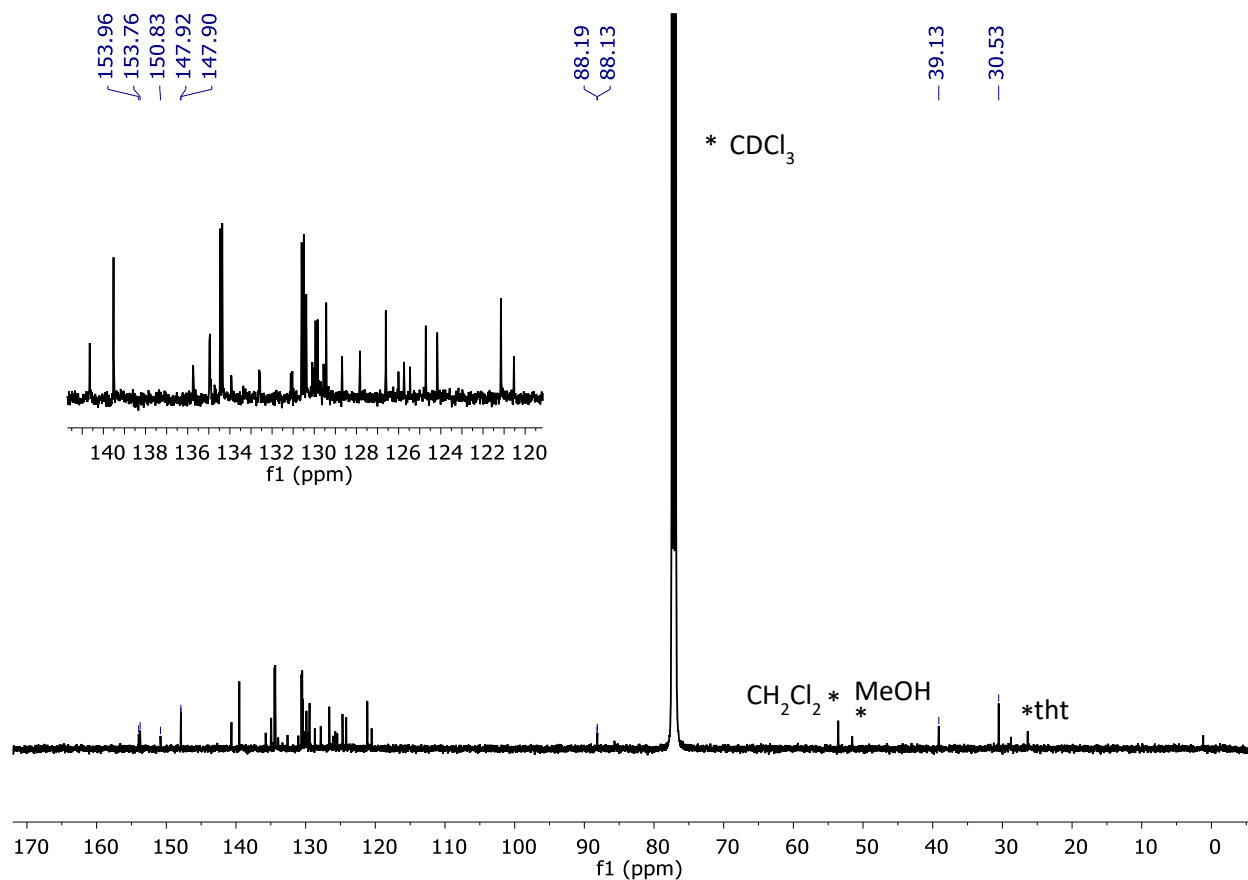

**Figure S9.** <sup>13</sup>C NMR (126 MHz, CDCl<sub>3</sub>, 298 K) spectrum of [2][BF<sub>4</sub>]

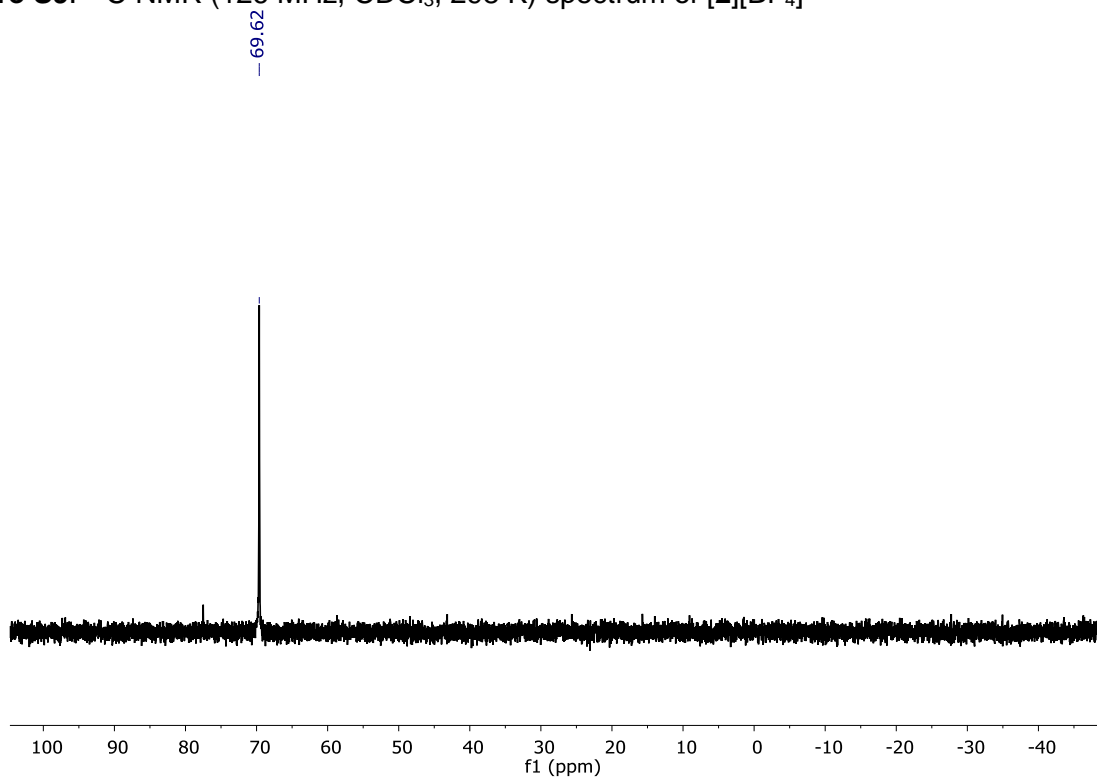

**Figure S10.** <sup>31</sup>P NMR (162 MHz, CD<sub>3</sub>CN, 298 K) spectrum of [2][BF<sub>4</sub>]

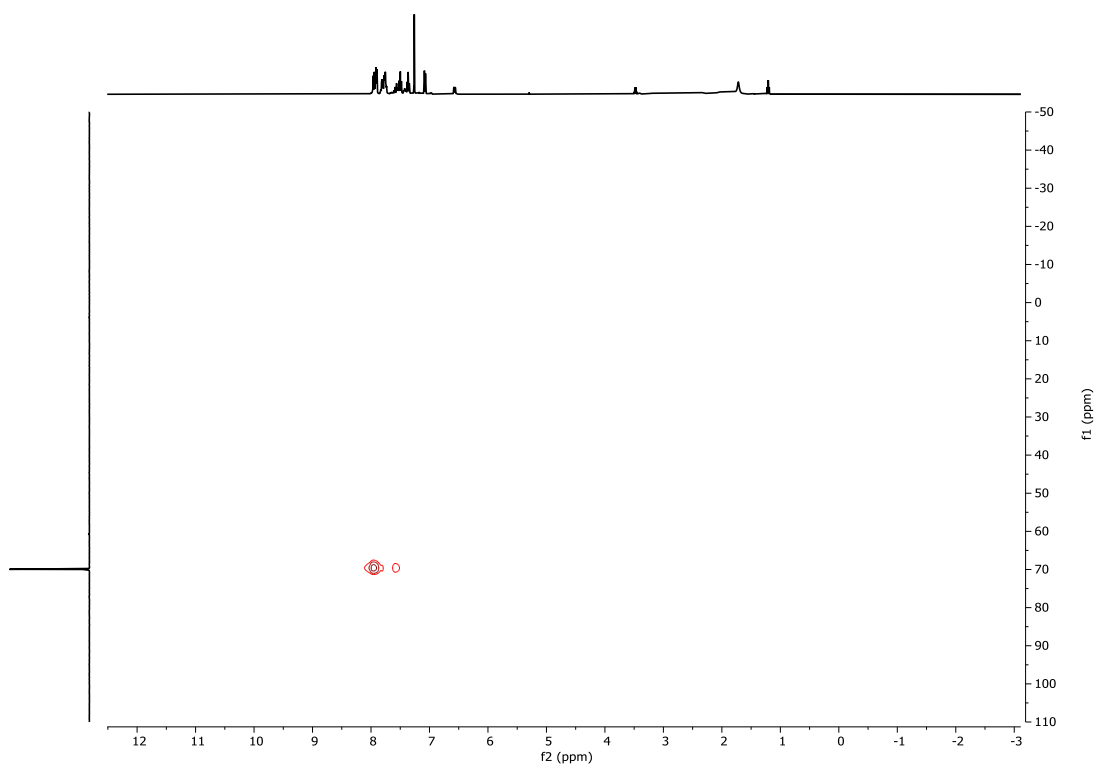

**Figure S11.** 2D-<sup>1</sup>H, <sup>31</sup>P-HSQC NMR (162 MHz, CDCl<sub>3</sub>, 298 K) spectrum of [2][BF<sub>4</sub>]. Both the <sup>1</sup>H and <sup>31</sup>P spectra are external projections.

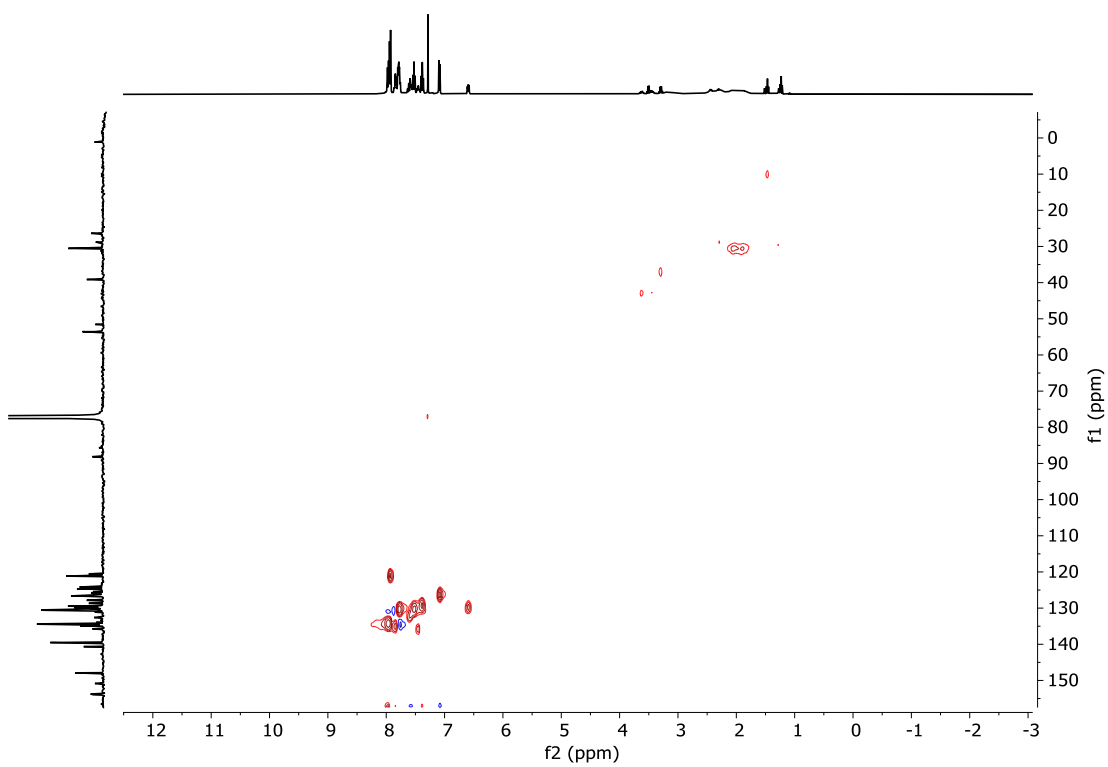

**Figure S12.** 2D- $^1\text{H}$ ,  $^{13}\text{C}$ -HSQC NMR (162 MHz,  $\text{CDCl}_3$ , 298 K) spectrum of  $[\mathbf{2}][\text{BF}_4]$ . Both the  $^1\text{H}$  and  $^{13}\text{C}$  spectra are external projections.

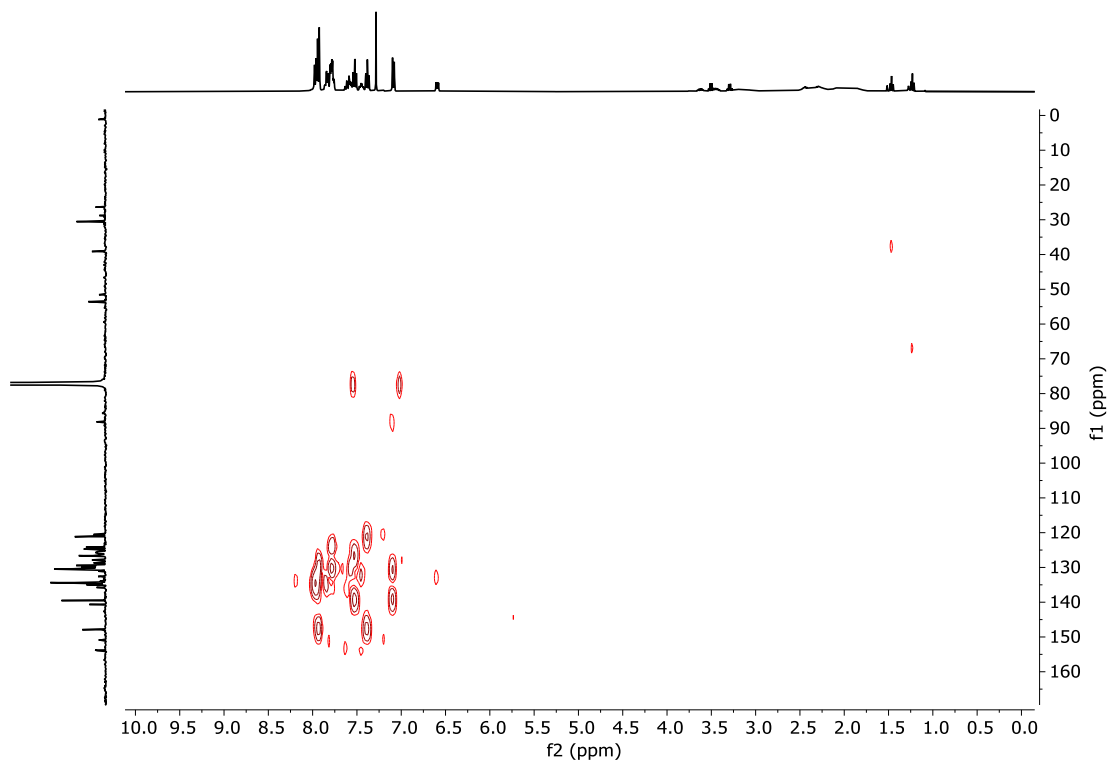

**Figure S13.** 2D- $^1\text{H}$ ,  $^{13}\text{C}$ -HMBC NMR (162 MHz,  $\text{CDCl}_3$ , 298 K) spectrum of  $[\mathbf{2}][\text{BF}_4]$ . Both the  $^1\text{H}$  and  $^{13}\text{C}$  spectra are external projections.

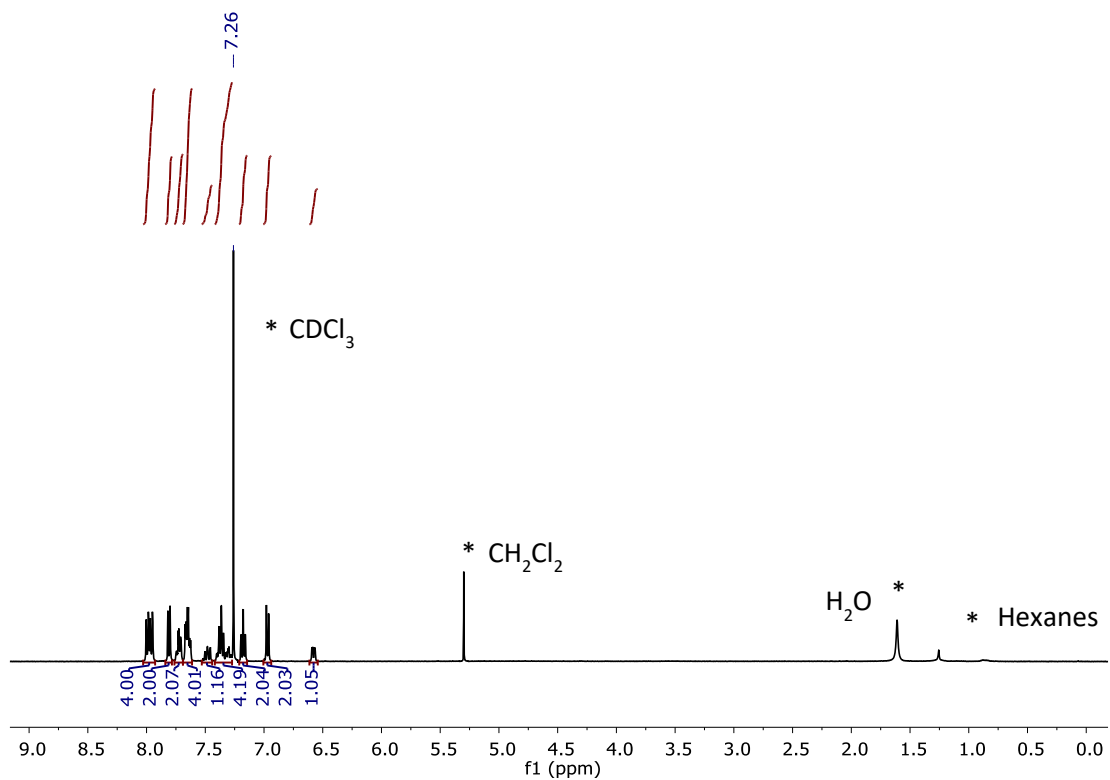

Figure S14.  $^1\text{H}$  NMR (400 MHz,  $\text{CDCl}_3$ , 298 K) spectrum of **3**.

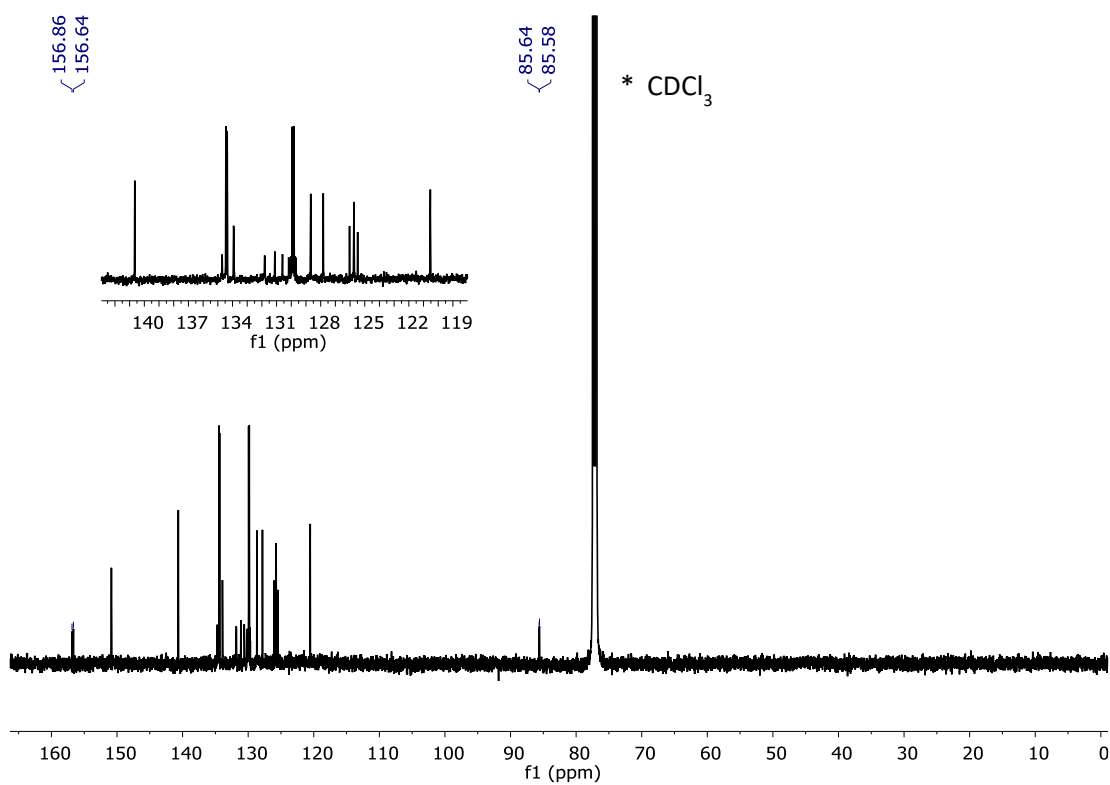

Figure S15.  $^{13}\text{C}$  NMR (126 MHz,  $\text{CDCl}_3$ , 298 K) spectrum of **3**.

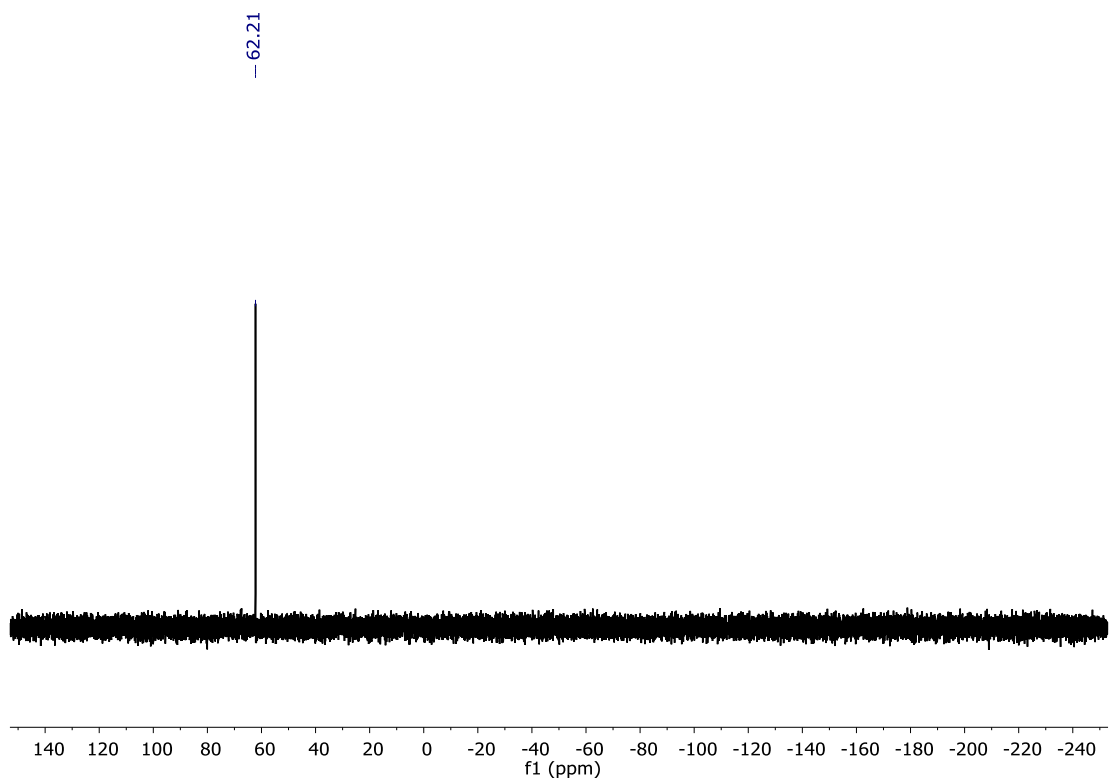

**Figure S16.**  $^{31}\text{P}$  NMR (162 MHz,  $\text{CD}_3\text{CN}$ , 298 K) spectrum of **3**

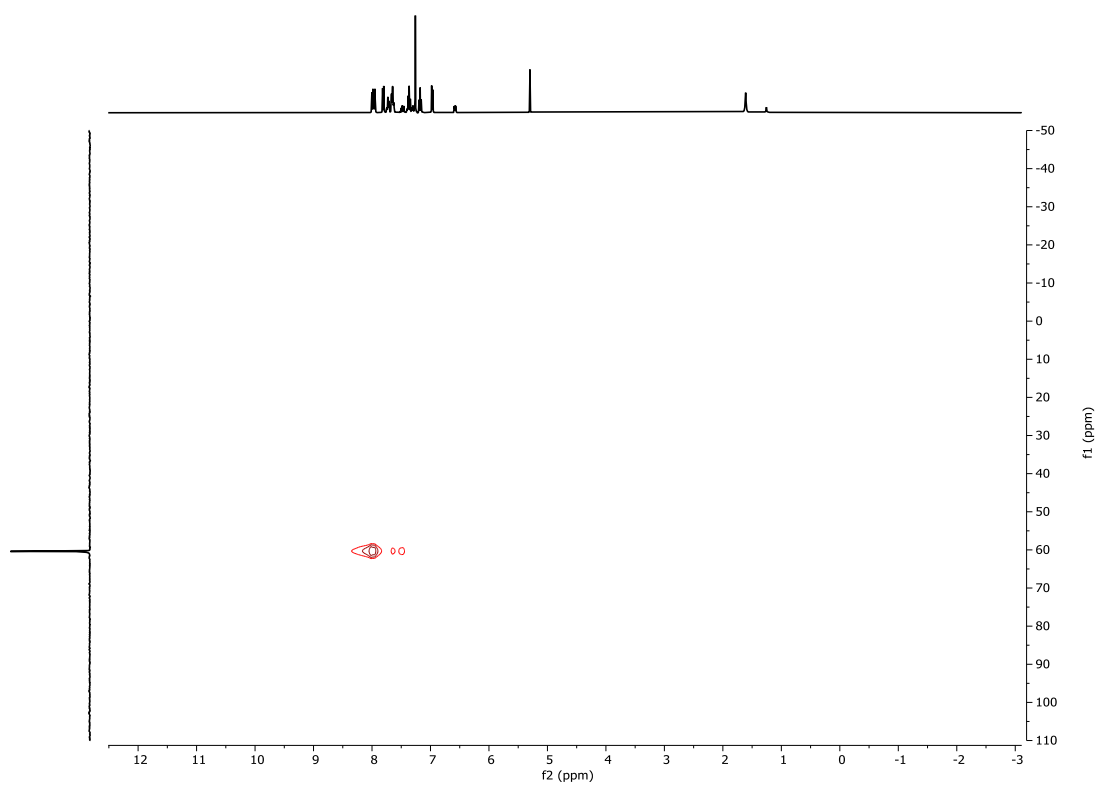

**Figure S17.** 2D- $^1\text{H}$ ,  $^{31}\text{P}$ -HSQC NMR (162 MHz,  $\text{CDCl}_3$ , 298 K) spectrum of **3**. Both the  $^1\text{H}$  and  $^{31}\text{P}$  spectra are external projections.

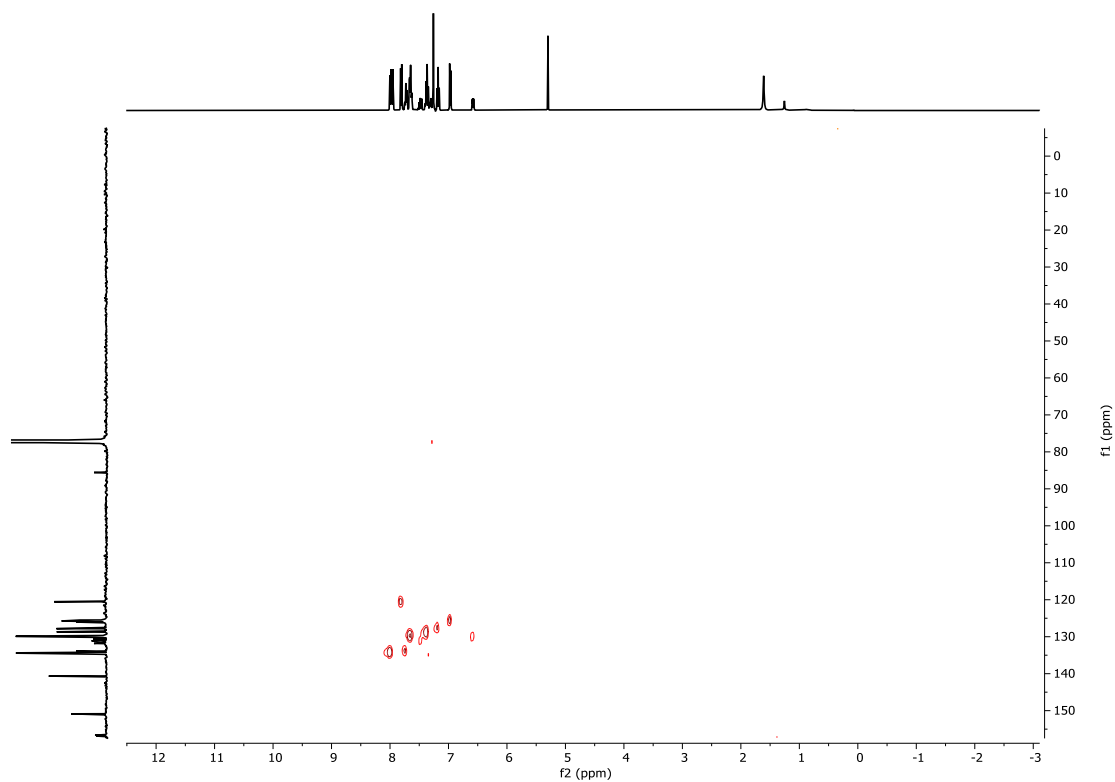

**Figure S18.** 2D- $^1\text{H}$ ,  $^{13}\text{C}$ -HSQC NMR (162 MHz,  $\text{CDCl}_3$ , 298 K) spectrum of **3**. Both the  $^1\text{H}$  and  $^{13}\text{C}$  spectra are external projections.

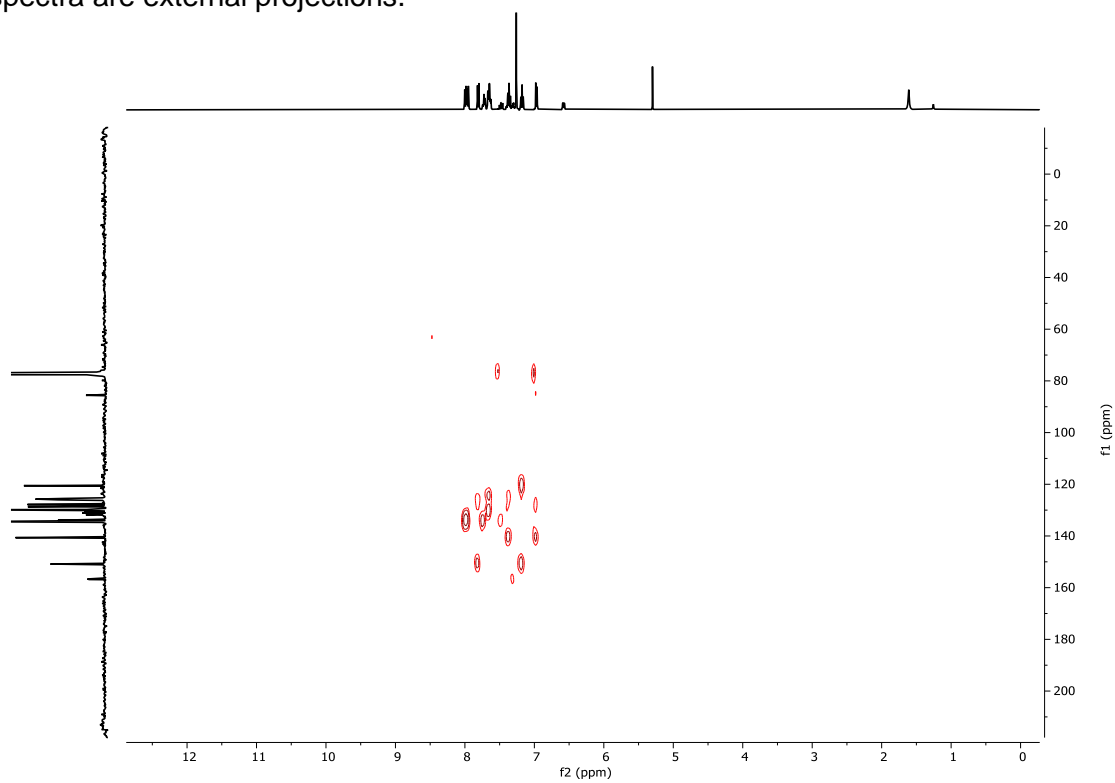

**Figure S19.** 2D- $^1\text{H}$ ,  $^{13}\text{C}$ -HMBC NMR (162 MHz,  $\text{CDCl}_3$ , 298 K) spectrum of **3**. Both the  $^1\text{H}$  and  $^{13}\text{C}$  spectra are external projections.

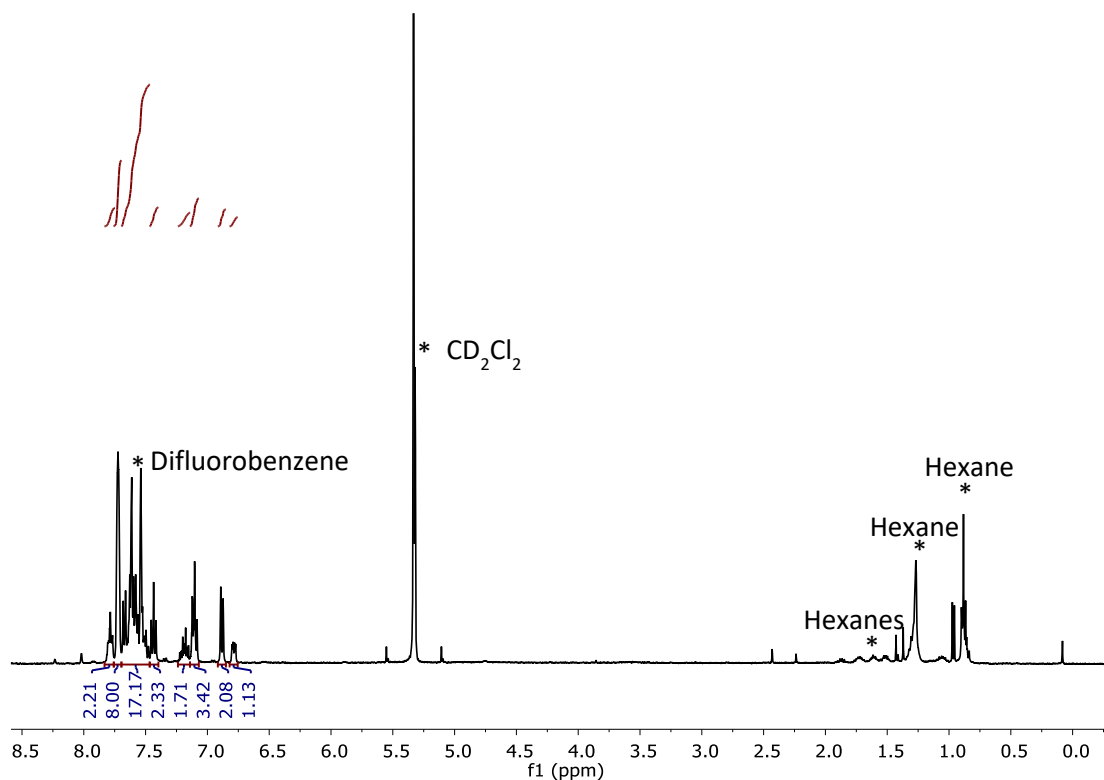

**Figure S20.**  $^1\text{H}$  NMR (400 MHz,  $\text{CD}_2\text{Cl}_2$ , 298 K) spectrum of  $[\mathbf{4}_2][\text{BArF}_{24}]_2$ .  $^1\text{H}$  NMR was collected from a batch of crystals which have hexanes and *o*-difluorobenzene in the crystal lattice. c

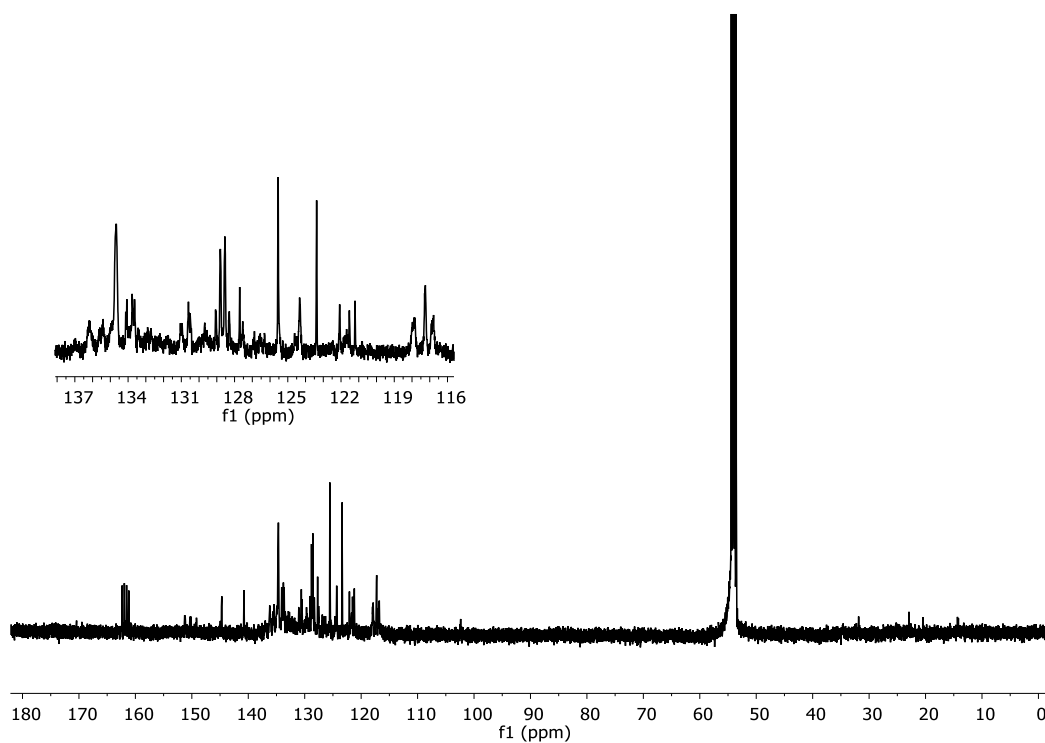

**Figure S21.**  $^{13}\text{C}$  NMR (126 MHz,  $\text{CD}_2\text{Cl}_2$ , 298 K) spectrum of  $[\mathbf{4}_2][\text{BArF}_{24}]_2$  at  $-40^\circ\text{C}$ . The VT NMR measurement suggests that this spectrum is of  $[\mathbf{4}][\text{BArF}_{24}]$ .

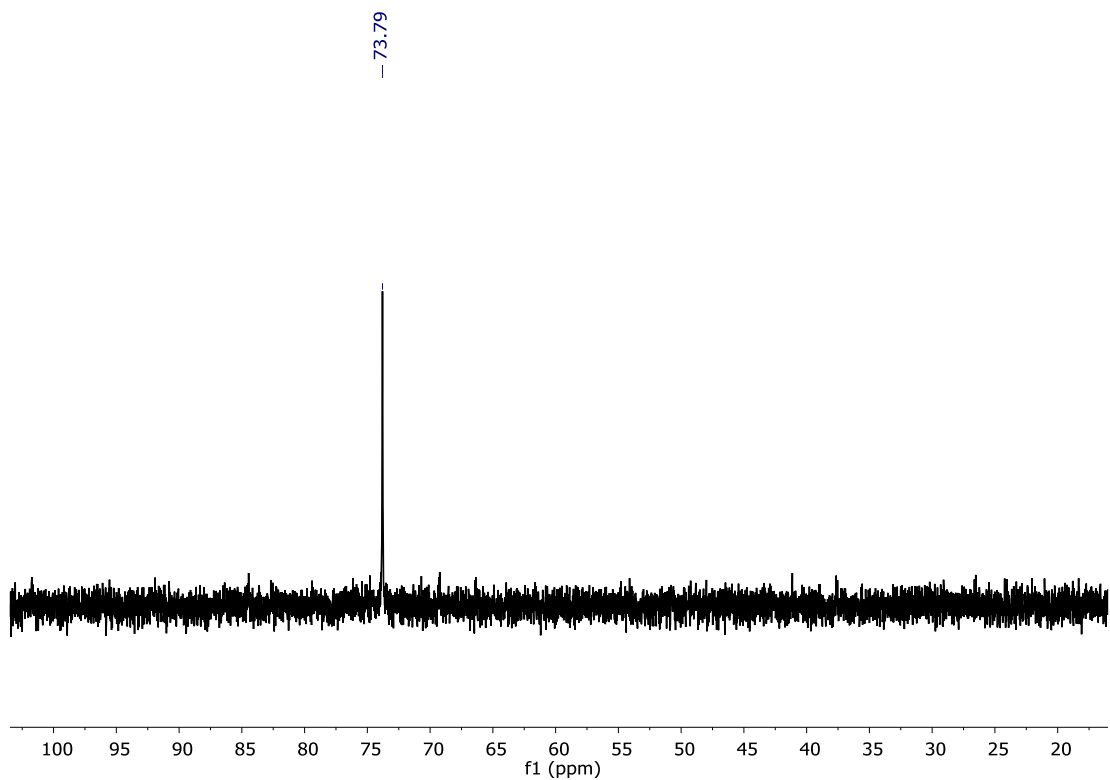

**Figure S22.**  $^{31}\text{P}$  NMR (162 MHz,  $\text{CD}_2\text{Cl}_2$ , 298 K) spectrum of  $[\mathbf{4}_2][\text{BArF}_{24}]_2$ . The VT NMR measurement suggests that this spectrum is of  $[\mathbf{4}][\text{BArF}_{24}]$ .

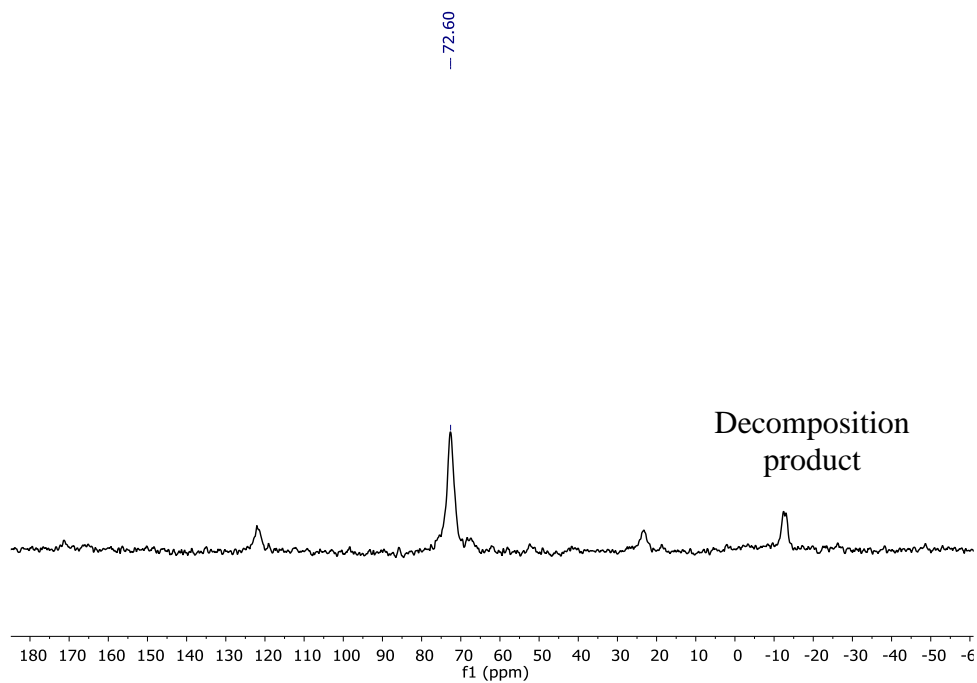

**Figure S23.** Solid-state  $^{31}\text{P}$  NMR (162 MHz, 298 K) spectrum of  $[\mathbf{4}_2][\text{BArF}_{24}]_2$ .



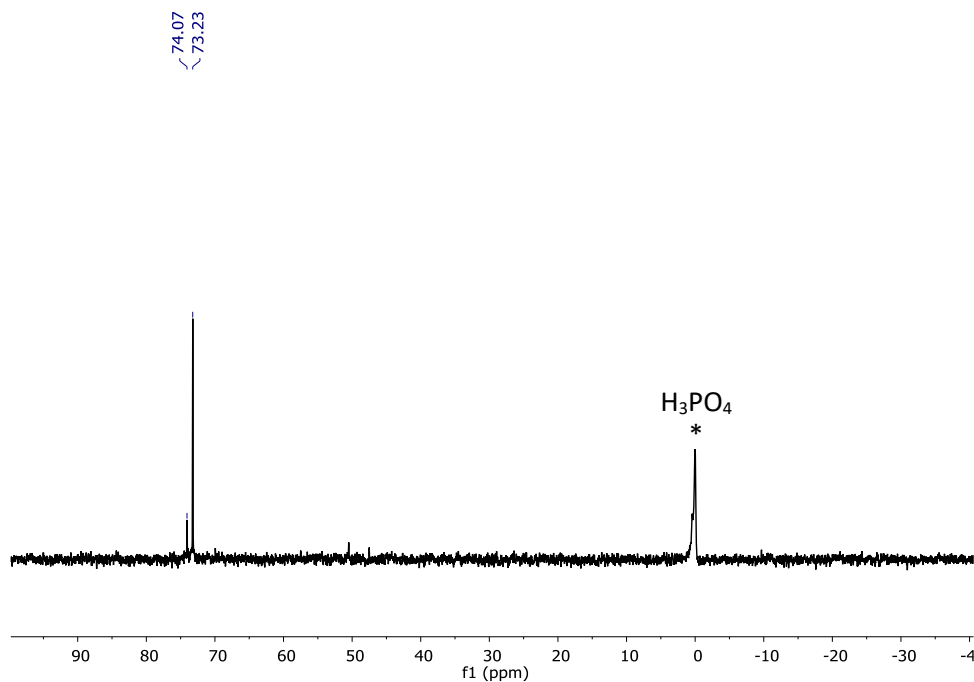

**Figure S24.** <sup>31</sup>P NMR (202 MHz, CD<sub>2</sub>Cl<sub>2</sub>, 258 K) spectrum of [4<sub>2</sub>][BArF<sub>24</sub>]<sub>2</sub>/[4][BArF<sub>24</sub>]. Referenced to H<sub>3</sub>PO<sub>4</sub>.

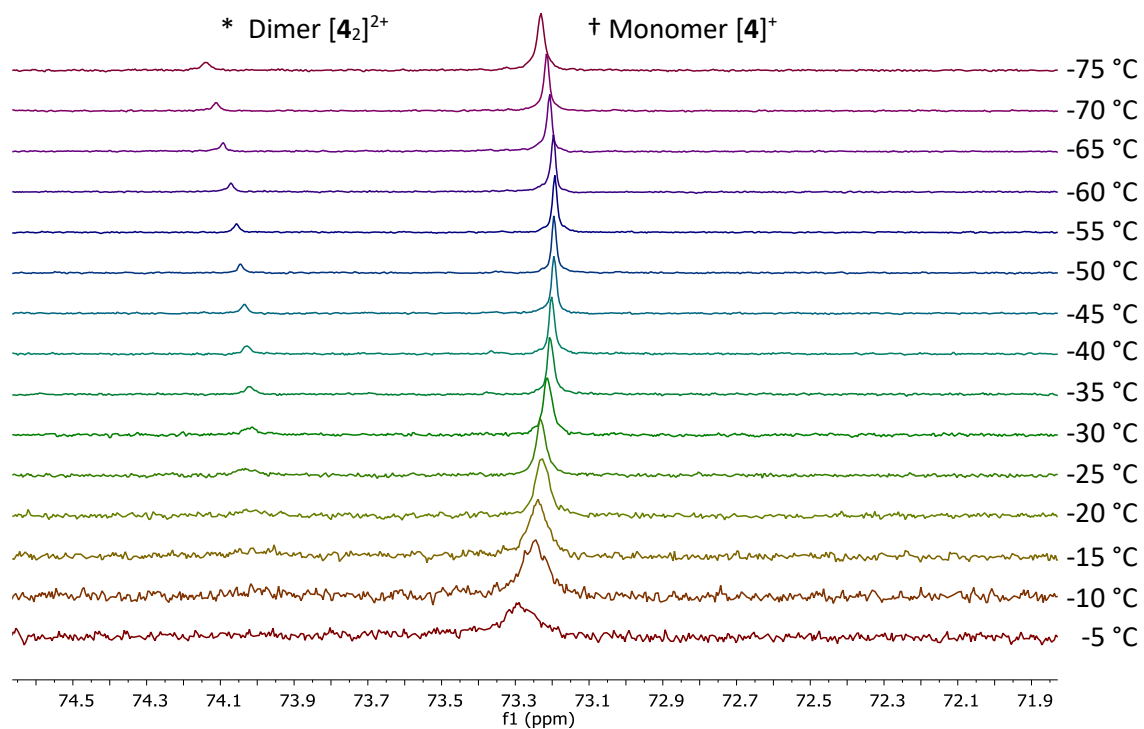

**Figure S25.** Variable temperature <sup>31</sup>P NMR (202 MHz, CD<sub>2</sub>Cl<sub>2</sub>) spectra of [4<sub>2</sub>][BArF<sub>24</sub>]<sub>2</sub>/[4][BArF<sub>24</sub>] from -75 °C to -5 °C showing two peaks attributed to the monomer and dimeric species coalesce at approximately -20 °C.

221104-112806\_2 #52-63 RT: 0.23-0.28 AV: 12 SB: 15 0.08-0.14 NL: 2.72E6  
T: FTMS + p ESI Full ms [100.0000-1000.0000]

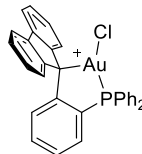

Chemical Formula:  $C_{31}H_{22}AuClP^+$

m/z: 657.08 (100.0%), 658.08 (33.5%), 659.08 (32.0%), 660.08 (10.8%), 659.09 (5.5%), 661.09 (1.8%)

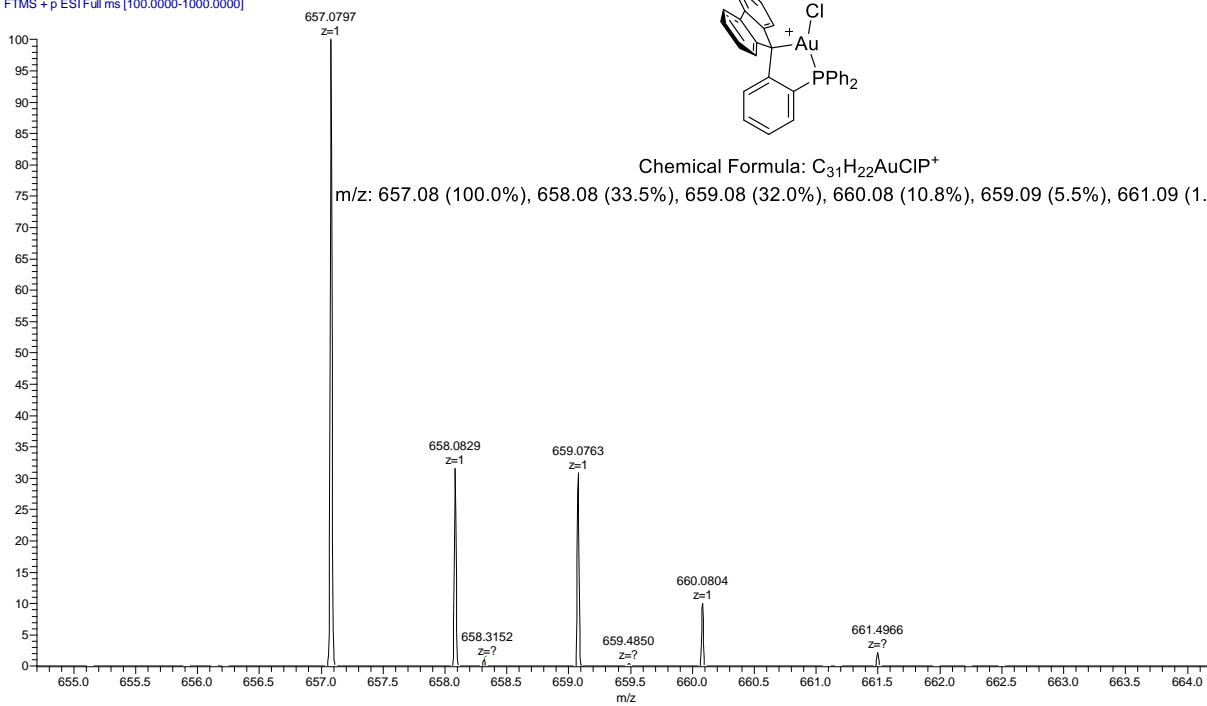

Figure S26. ESI(+)-mass spectrum of  $[4][BARF_{24}]$ .

## 2.2 Catalytic studies

For the catalytic studies, the eneyne (23.8 mg, 25  $\mu$ l, 0.1 mmol) was loaded into an NMR tube. The freshly crystallized pre-catalyst (2  $\mu$ mol, 2 mol%) was then weighed out and dissolved in  $\text{CD}_2\text{Cl}_2$  (0.6 ml). The solution was then added to the NMR tube in the NMR room. Reaction progress was monitored in situ via  $^1\text{H}$  NMR. Final conversion of the reaction was measured based on the integrated  $^1\text{H}$  NMR spectra.<sup>2</sup> 6-Endo:  $^1\text{H}$  NMR (500 MHz,  $\text{CD}_2\text{Cl}_2$ , 298 K)  $\delta$ /ppm: 6.19 (d,  $J$  = 9.9 Hz, 1H), 5.91 – 5.76 (m, 1H), 5.02 – 4.94 (d,  $J$  = 16.1 Hz, 2H), 4.15 (m, 4H), 2.85 (t,  $J$  = 1.6 Hz, 2H), 2.68 (dd,  $J$  = 4.4, 2.1 Hz, 4H), 1.22 (m, 6H). 6-Exo:  $^1\text{H}$  NMR (500 MHz,  $\text{CD}_2\text{Cl}_2$ , 298 K)  $\delta$ /ppm: 6.55 (dd,  $J$  = 17.6, 10.4 Hz, 1H), 5.62 (t,  $J$  = 2.4 Hz, 1H), 5.16 – 5.09 (m, 2H), 4.15 (m, 4H), 3.08 (dt,  $J$  = 11.2, 2.2 Hz, 4H), 1.22 (m, 6H). The results of these catalysis experiments are presented in the table in Scheme 4 of the main text.

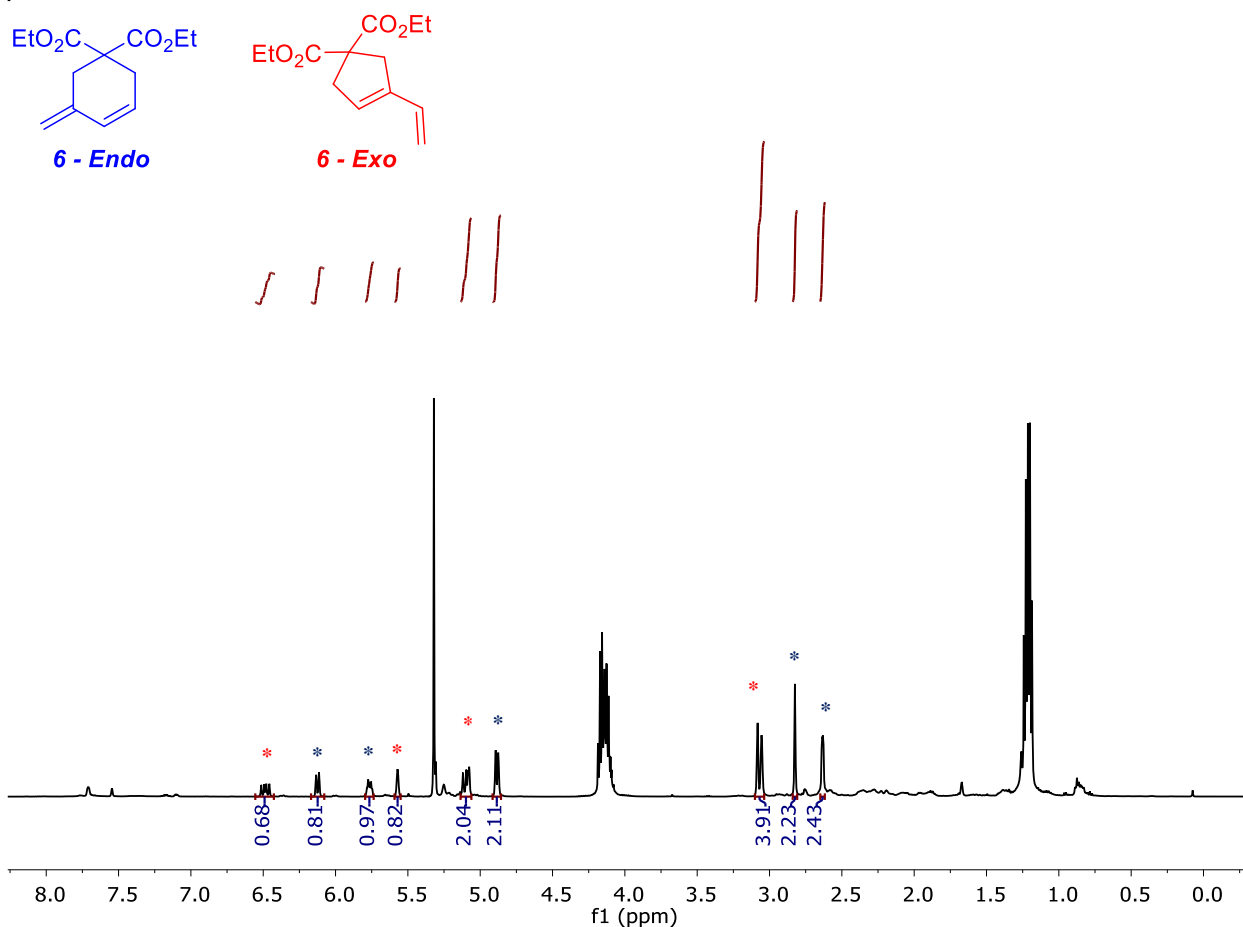

**Figure S27.** *In situ*  $^1\text{H}$  NMR (500 MHz,  $\text{CD}_2\text{Cl}_2$ , 298 K) spectrum of reaction outlined in scheme 4.

### 3 Computational studies

#### 3.1 General methods

The structures of  $[2]^+$ , **3**,  $[4]^+$ ,  $[4_2]^{2+}$ ,  $[\text{Ph}_3\text{P}(\text{Me})\text{Au}(\text{Cl})]^+$ , and  $[(\text{Ph}_3\text{P}(\text{Me})\text{Au}(\mu_2\text{-Cl}))_2]^{2+}$  were optimized using DFT methods as implemented in Gaussian 16 using the MPW1PW91 functional and a mixed basis set defined as follows: Au cc-PVTZ-PP; P 6-31G(d',p'); C/N/O 6-31G(d'); H 6-31G. Frequency calculations, performed using the same level of theory on the optimized geometries, found no imaginary frequencies. Simulated NMR spectra using the GIAO method were calculated using the PBEPBE functional with the same mixed basis set. This NMR calculation afforded chemical shifts for  $[4]^+$  and  $[4_2]^{2+}$  separated by exactly 1 ppm which is close to the separation observed experimentally (see main text). The Pipek-Mezey orbitals were calculated using the multiwfn program.<sup>3</sup> The resulting optimized structures and Pipek-Mezey orbitals were visualized using the Avogadro program.<sup>4</sup>

#### 3.2 Geometry optimized structures

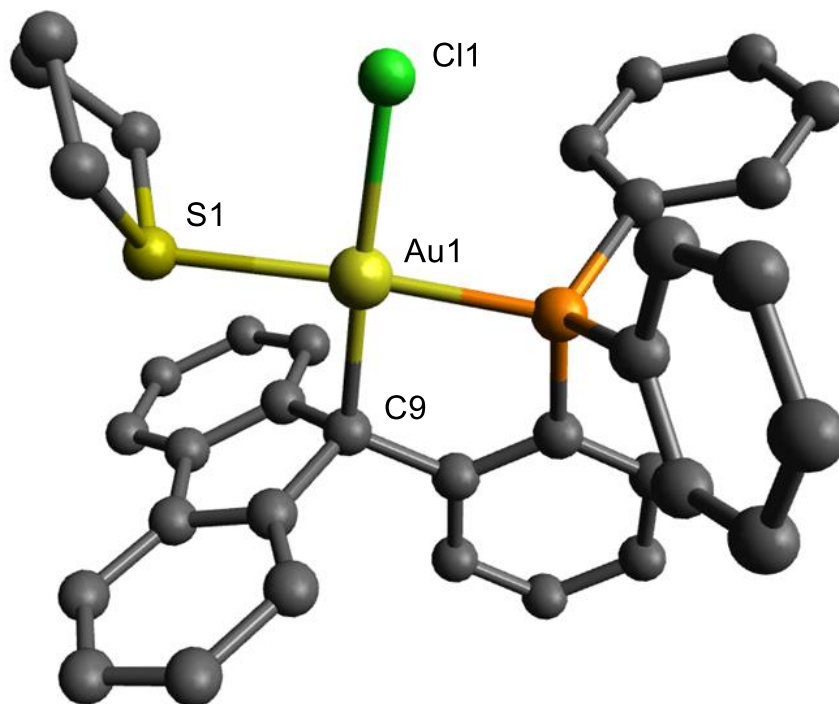

**Figure S28.** Optimized structure of compound  $[2]^+$ . Computed bond distances: Au1-C9 2.14 Å; Au1-Cl1 2.38 Å; Au1-S1 2.45 Å.

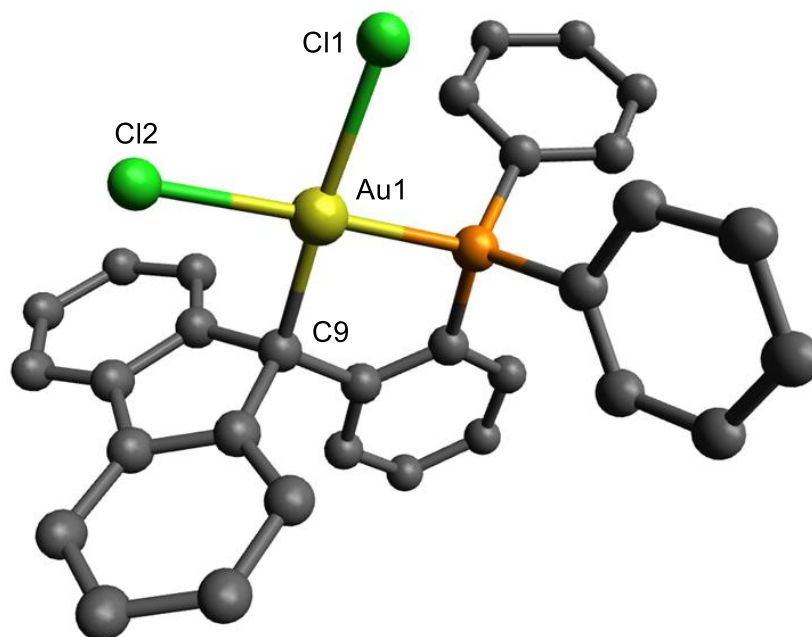

**Figure S29.** Optimized structure of compound **3**. Computed bond distances: Au1-C9 2.13 Å; Au1-Cl1 2.38 Å; Au1-Cl2 2.32 Å.

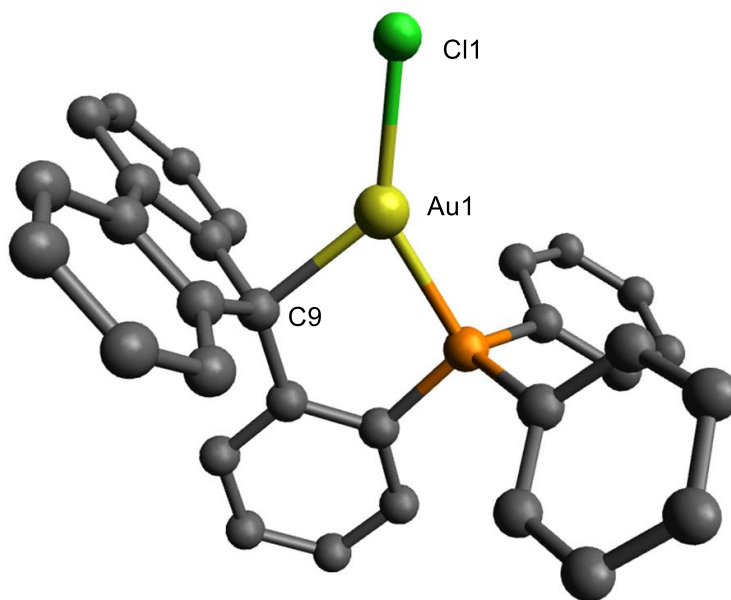

**Figure S30.** Optimized structure of compound **[4]<sup>+</sup>**. Computed bond distances: Au1-C9 2.19 Å; Au1-Cl1 2.28 Å.

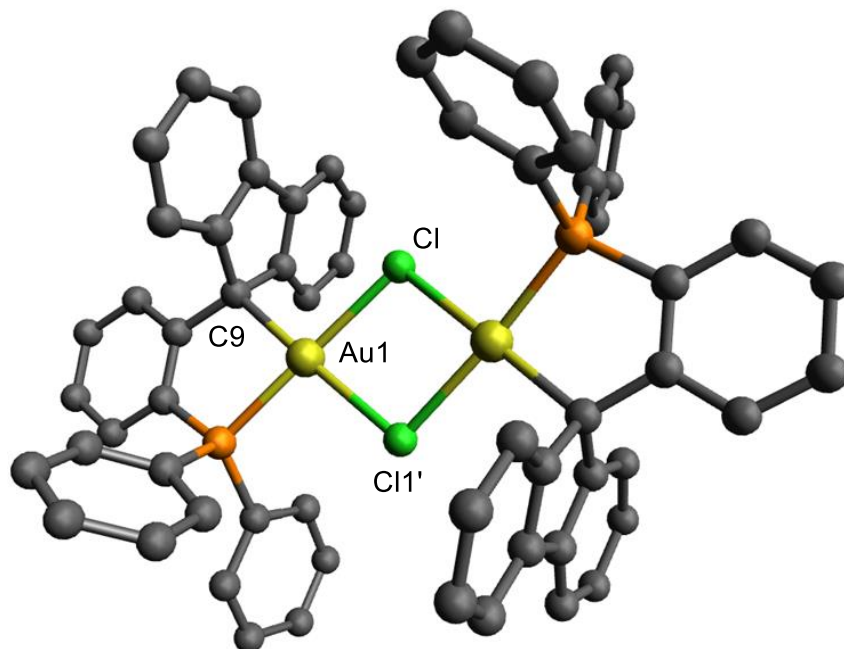

**Figure S31.** Optimized structure of compound  $[4_2]^{2+}$ . Computed bond distances: Au1-C9 2.15 Å; Au1-Cl1 2.45 Å; Au1-Cl1' 2.51 Å, Average Au-Cl bond length 2.48 Å.

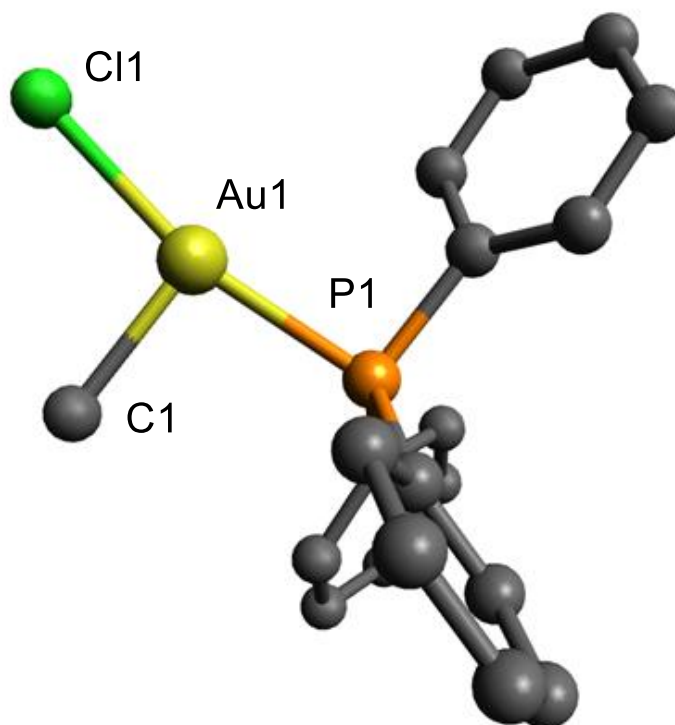

**Figure S32.** Optimized structure of compound  $[\text{Ph}_3\text{P}(\text{Me})\text{AuCl}]^+$ . Computed bond distances: Au1-C1 2.06 Å; Au1-Cl1 2.27 Å.

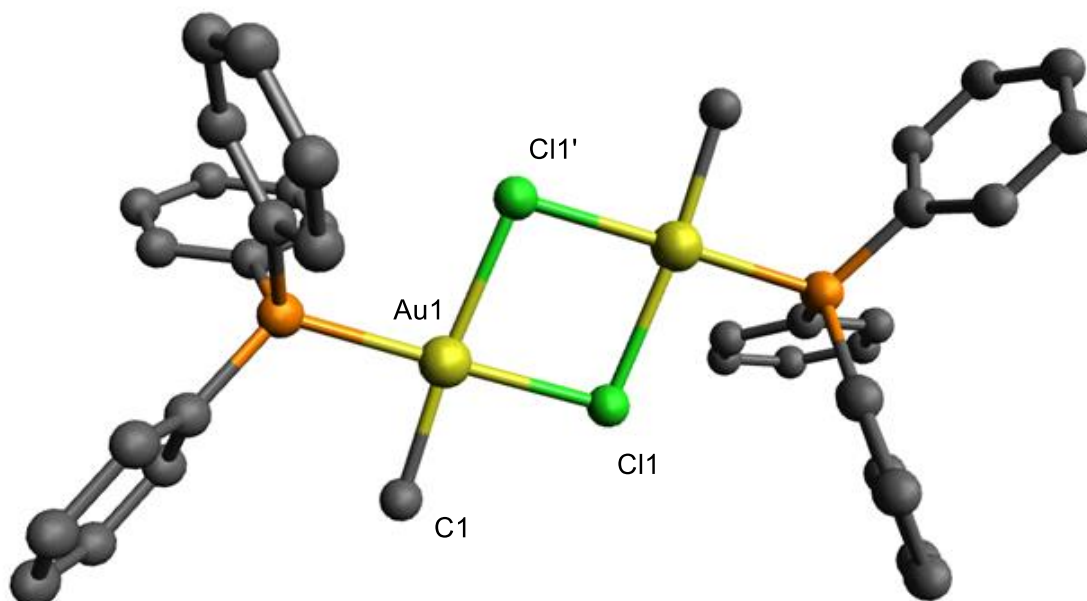

**Figure S33.** Optimized structure of compound  $[(\text{Ph}_3\text{P}(\text{Me})\text{Au}(\mu_2\text{-Cl}))_2]^{2+}$ . Computed bond distances: Au1-C1 2.06 Å; Au1-Cl1 2.49 Å; Au1-Cl1' 2.44 Å.

### 3.3 Pipek-Mezey orbitals

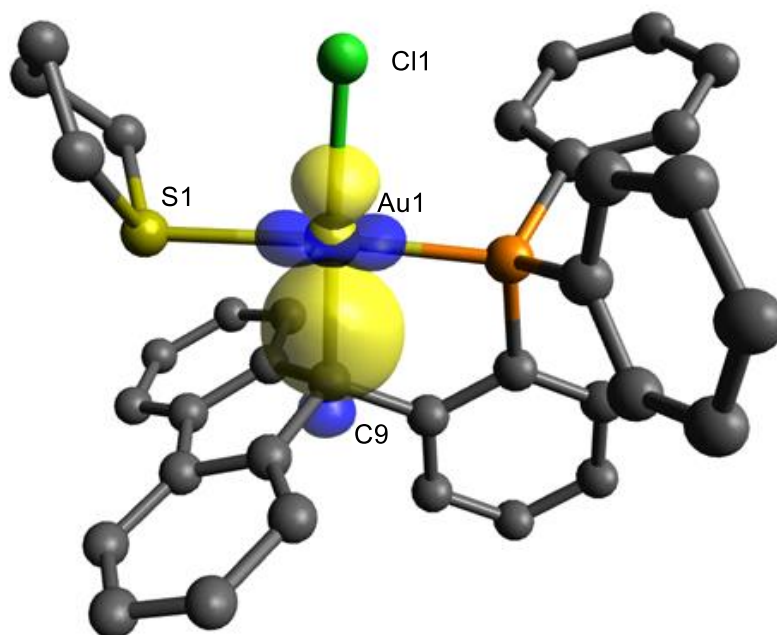

**Figure S34.** Pipek-Mezey orbital depicting the Au-C9 bond in complex  $[2]^+$ . Au: 54.0% C: 32.2%

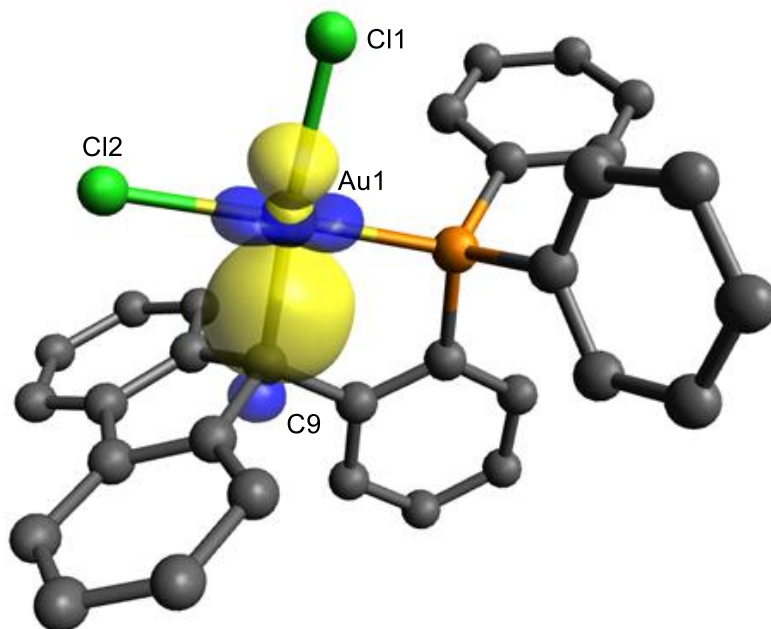

**Figure S35.** Pipek-Mezey orbital depicting the Au-C9 bond in complex **3**. Au: 50.1% C: 35.6%



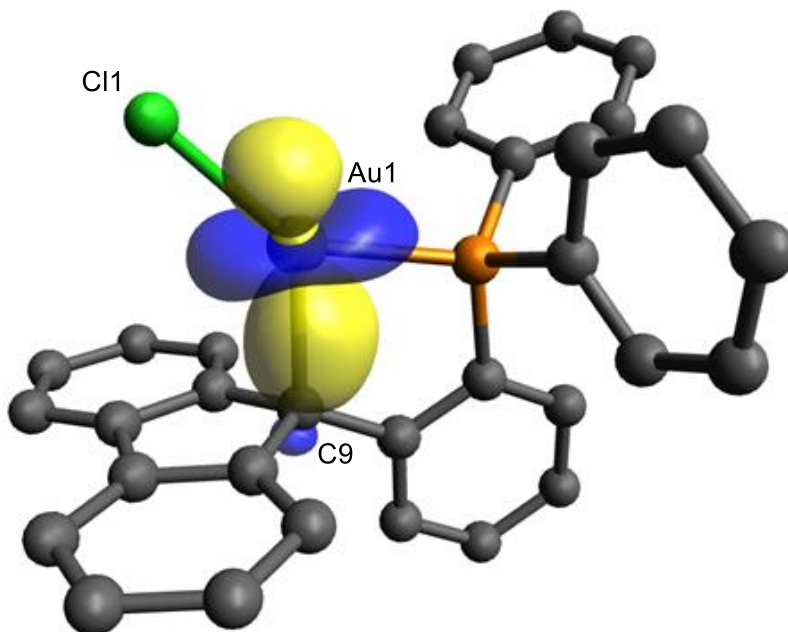

**Figure S36.** Pipek-Mezzey orbital depicting the Au-C9 bond in complex  $[4]^+$ . Au: 72.5% C: 15.4%

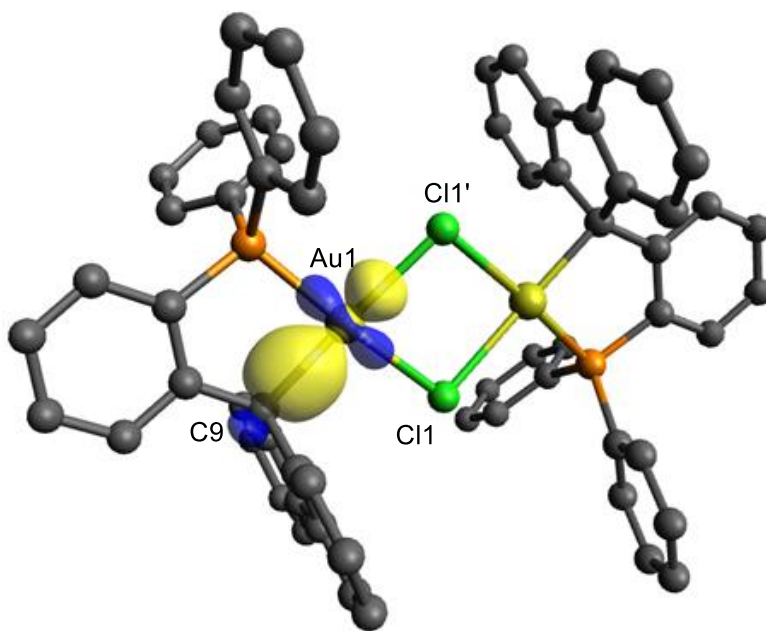

**Figure S37.** Pipek-Mezzey orbital depicting the Au-C9 bond in complex  $[4_2]^{2+}$ . Au: 64.4% C: 23.4%

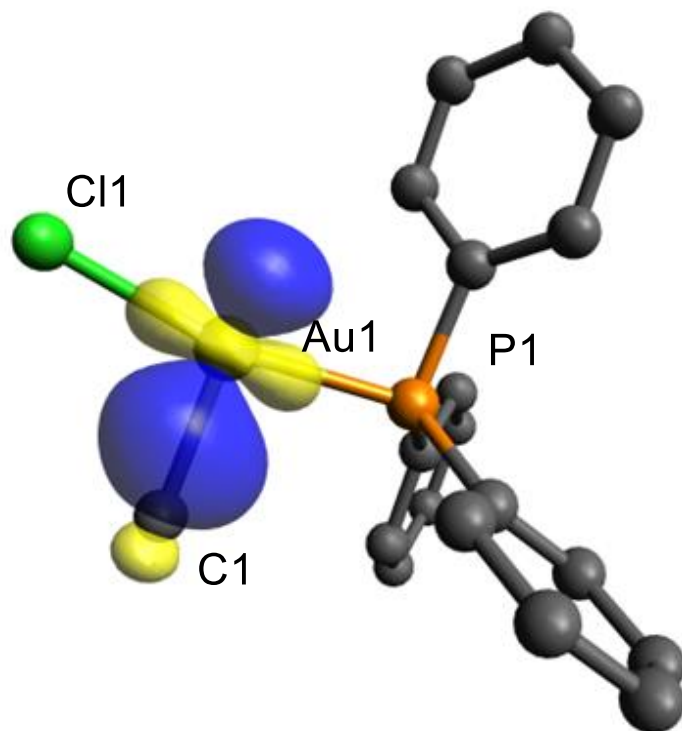

**Figure S38.** Pipek-Mezey orbital depicting the Au-C1 bond in complex  $[\text{Ph}_3\text{P}(\text{Me})\text{AuCl}]^+$ . Au: 63.8% C: 28.1%

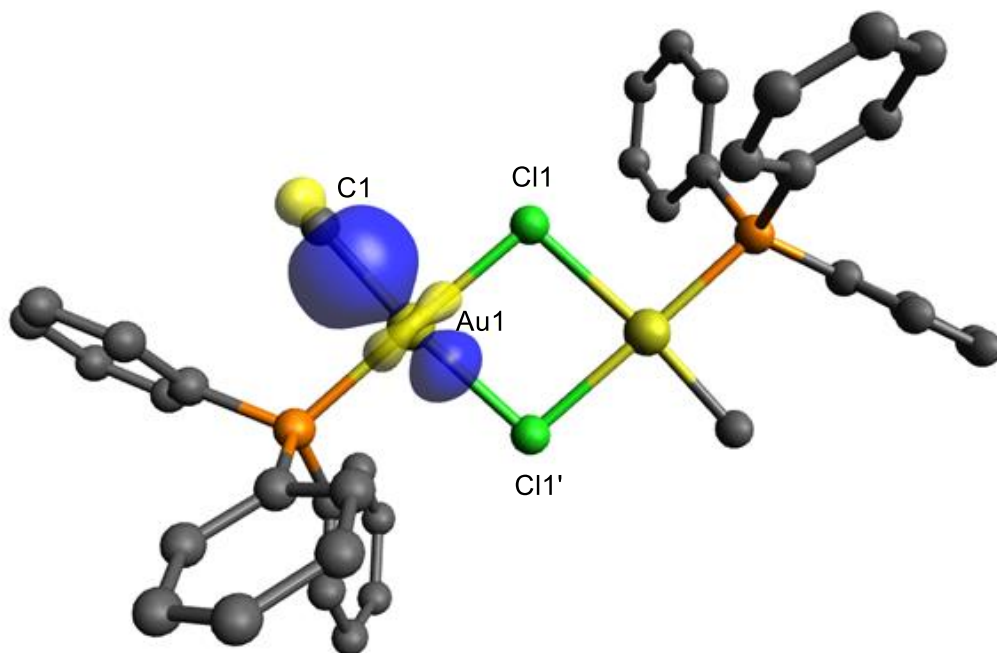

**Figure S39.** Pipek-Mezey orbital depicting the Au-C1 bond in complex  $[(\text{Ph}_3\text{P}(\text{Me})\text{Au}(\mu_2\text{-Cl}))_2]^{2+}$ . Au: 55.6% C: 34.2%

### 3.5 Cartesian coordinates of geometry optimized structures

| Atom Number | Coordinates |          |          | Atom Number | Coordinates |          |          |
|-------------|-------------|----------|----------|-------------|-------------|----------|----------|
|             | X           | Y        | Z        |             | X           | Y        | Z        |
| Au1         | -0.19984    | -0.66269 | -0.16206 | C36         | -1.85648    | 0.57436  | 2.73031  |
| P2          | 0.69767     | -2.81762 | -0.63677 | C37         | -2.76062    | -2.83393 | 0.60913  |
| Cl3         | 1.89711     | 0.2431   | 0.14891  | C38         | -2.20717    | 2.69127  | -2.96074 |
| C4          | -2.46779    | -1.48326 | -0.60114 | C39         | 2.40605     | -1.37171 | 2.35083  |
| C5          | 3.85934     | -0.51657 | -3.34048 | H40         | 4.20635     | -1.3454  | -3.84806 |
| C6          | 4.03422     | 0.75573  | -3.88541 | H41         | 4.51005     | 0.86488  | -4.79464 |
| C7          | 2.92576     | 1.73794  | -1.97897 | H42         | 2.57718     | 2.56964  | -1.47719 |
| C8          | 2.50076     | 2.72596  | 1.33931  | H43         | 3.49327     | 2.44322  | 1.33689  |
| C9          | 2.75454     | 0.46049  | -1.42877 | H44         | 2.84283     | 4.61988  | 2.19097  |
| C10         | 2.12862     | 3.96993  | 1.82698  | H45         | -1.18348    | 3.75349  | 1.35328  |
| C11         | -0.93557    | 1.26838  | 0.37858  | H46         | 0.50314     | 5.26687  | 2.1761   |
| C12         | 0.16256     | 2.20165  | 0.85836  | H47         | 6.20256     | -1.28375 | 1.90136  |
| C13         | -0.19211    | 3.46683  | 1.34686  | H48         | 5.22686     | -2.46032 | 3.77986  |
| C14         | 1.51573     | 1.85575  | 0.84945  | H49         | -5.34568    | 1.36055  | 1.293    |
| C15         | 0.77978     | 4.33773  | 1.82229  | H50         | 3.0866      | -1.61361 | -1.71497 |
| C16         | -1.72648    | 1.79146  | -0.79053 | H51         | 4.77387     | -0.15813 | 0.29547  |
| C17         | 5.17752     | -1.30514 | 2.01909  | H52         | -5.10302    | 0.5583   | 3.57225  |
| C18         | 4.61608     | -1.98215 | 3.09917  | H53         | 3.70026     | 2.81861  | -3.61315 |
| C19         | -4.41054    | 1.14784  | 1.67417  | H54         | -5.03776    | 2.25442  | -1.19708 |
| C20         | 3.21922     | -0.67199 | -2.11596 | H55         | -2.91338    | 0.08338  | 4.48569  |
| C21         | -3.27101    | 1.31165  | 0.88876  | H56         | 2.81975     | -2.52044 | 4.0651   |
| C22         | 4.35876     | -0.6571  | 1.09781  | H57         | -1.66521    | -4.49457 | -1.31079 |
| C23         | -4.26557    | 0.69155  | 2.98407  | H58         | -3.13301    | -4.64041 | -2.22626 |
| C24         | 3.56855     | 1.87947  | -3.20609 | H59         | -0.26509    | 2.24591  | -2.24817 |
| C25         | -1.99807    | 1.01158  | 1.41554  | H60         | -3.18036    | -2.37683 | -2.7486  |
| C26         | -4.02959    | 2.24897  | -1.41753 | H61         | -1.47       | -2.54039 | -2.56694 |
| C27         | -3.10153    | 1.79959  | -0.48138 | H62         | -4.24943    | 3.02335  | -3.36217 |
| C28         | -3.00078    | 0.41211  | 3.51136  | H63         | -3.39431    | -4.86129 | 0.31299  |
| C29         | 2.96846     | -0.68639 | 1.26635  | H64         | -4.44631    | -3.70573 | -0.41753 |
| C30         | 3.23142     | -2.01627 | 3.26424  | H65         | -0.92194    | 0.37408  | 3.1196   |
| C31         | -2.61267    | -4.03914 | -1.51028 | H66         | -3.4099     | -2.50707 | 1.39431  |
| C32         | -1.27307    | 2.24295  | -2.02683 | H67         | -1.86094    | -3.16142 | 1.08687  |
| C33         | -2.40506    | -2.62256 | -2.05331 | H68         | -1.88788    | 3.02582  | -3.88332 |
| C34         | -3.57178    | 2.69142  | -2.65815 | H69         | 1.38142     | -1.39787 | 2.47117  |
| C35         | -3.4199     | -3.93243 | -0.21754 |             |             |          |          |

**Table S1.** Cartesian coordinates for compound [2]<sup>+</sup>.

| Atom<br>Number | Coordinates |          |          | Atom<br>Number | Coordinates |          |          |
|----------------|-------------|----------|----------|----------------|-------------|----------|----------|
|                | X           | Y        | Z        |                | X           | Y        | Z        |
| Au1            | -0.18042    | -0.2875  | -1.09881 | C30            | 2.46173     | 1.58709  | 0.06246  |
| P2             | 1.56216     | 0.03151  | 0.3356   | C31            | 3.25833     | 1.7179   | -1.08464 |
| Cl3            | -1.98248    | -0.53914 | -2.54682 | C32            | 3.93116     | 2.9114   | -1.32352 |
| Cl4            | 1.36567     | -0.6953  | -2.86664 | C33            | 3.81304     | 3.97681  | -0.43151 |
| C5             | -0.65084    | 0.15643  | 1.88673  | C34            | 3.01664     | 3.85082  | 0.70393  |
| C6             | -1.43805    | 0.04943  | 0.58729  | C35            | 2.33828     | 2.65988  | 0.95369  |
| C7             | 0.72087     | 0.30043  | 4.34647  | H36            | 1.21721     | 0.3445   | 5.25019  |
| C8             | -2.46945    | -1.04877 | 0.64603  | H37            | -2.38388    | 0.31064  | 3.0863   |
| C9             | 0.74502     | 0.13154  | 1.94104  | H38            | 2.46449     | 0.15558  | 3.17862  |
| C10            | -1.3525     | 0.27646  | 3.09651  | H39            | -5.8055     | -0.98624 | 0.20751  |
| C11            | 1.43326     | 0.19185  | 3.16213  | H40            | -1.20981    | 0.44155  | 5.18459  |
| C12            | -2.27501    | 1.27225  | 0.30795  | H41            | -0.88682    | 2.86256  | 0.30585  |
| C13            | -4.8644     | -1.36351 | 0.39993  | H42            | -1.36019    | -2.7737  | 1.14446  |
| C14            | -3.62971    | 0.91401  | 0.17476  | H43            | -5.58427    | 1.62759  | -0.19176 |
| C15            | -0.67633    | 0.34973  | 4.30596  | H44            | -2.56488    | 4.56012  | -0.1583  |
| C16            | -3.75083    | -0.52782 | 0.38847  | H45            | -4.88994    | 3.94426  | -0.41441 |
| C17            | -1.87869    | 2.59979  | 0.19558  | H46            | -3.30328    | -4.2352  | 1.15673  |
| C18            | -2.29835    | -2.39652 | 0.93802  | H47            | -5.5032     | -3.34945 | 0.67912  |
| C19            | -4.59047    | 1.88631  | -0.08944 | H48            | 5.9526      | -1.90461 | 1.34129  |
| C20            | -2.84475    | 3.57083  | -0.06882 | H49            | 5.30972     | -4.15409 | 0.70829  |
| C21            | -4.18784    | 3.21508  | -0.21346 | H50            | 3.08285     | -4.5889  | -0.14371 |
| C22            | -3.416      | -3.23096 | 0.94739  | H51            | 1.48614     | -2.7782  | -0.35243 |
| C23            | -4.68681    | -2.71816 | 0.67566  | H52            | 4.36317     | -0.08452 | 1.13673  |
| C24            | 5.00172     | -2.08775 | 0.98447  | H53            | 3.34474     | 0.93224  | -1.74819 |
| C25            | 4.63274     | -3.38039 | 0.61825  | H54            | 4.52067     | 3.00906  | -2.16493 |
| C26            | 3.35124     | -3.63089 | 0.13054  | H55            | 4.31624     | 4.85935  | -0.61297 |
| C27            | 2.43335     | -2.59242 | 0.01267  | H56            | 2.92879     | 4.64121  | 1.36164  |
| C28            | 2.79754     | -1.29512 | 0.39042  | H57            | 1.746       | 2.56858  | 1.79386  |
| C29            | 4.08876     | -1.0428  | 0.86948  |                |             |          |          |

**Table S2.** Cartesian coordinates for compound **3**.

| Atom Number | Coordinates |          |          | Atom Number | Coordinates |          |          |
|-------------|-------------|----------|----------|-------------|-------------|----------|----------|
|             | X           | Y        | Z        |             | X           | Y        | Z        |
| Au1         | -0.36571    | -0.2719  | -1.01231 | C29         | 2.36143     | 1.5346   | -0.15831 |
| P2          | 1.52747     | -0.01847 | 0.23533  | C30         | 2.86204     | 1.70839  | -1.4589  |
| Cl3         | -1.1373     | -0.65495 | -3.12442 | C31         | 3.47767     | 2.90499  | -1.80613 |
| C4          | -0.41837    | 0.066    | 2.09792  | C32         | 3.59502     | 3.92968  | -0.86624 |
| C5          | -1.3424     | 0.07299  | 0.91482  | C33         | 3.09625     | 3.75997  | 0.42374  |
| C6          | 1.26542     | 0.01752  | 4.33836  | C34         | 2.47409     | 2.56667  | 0.78211  |
| C7          | -2.3321     | -1.01773 | 0.74522  | H35         | 1.87873     | -0.00536 | 5.16803  |
| C8          | 0.96907     | 0.00559  | 1.95047  | H36         | -1.98438    | 0.16994  | 3.51496  |
| C9          | -0.96178    | 0.11656  | 3.38669  | H37         | 2.83952     | -0.0869  | 2.93913  |
| C10         | 1.81673     | -0.0284  | 3.06361  | H38         | -5.44944    | -0.95639 | -0.52195 |
| C11         | -2.06886    | 1.30897  | 0.52777  | H39         | -0.52513    | 0.13599  | 5.44299  |
| C12         | -4.58244    | -1.32874 | -0.10397 | H40         | -0.71689    | 2.88402  | 0.9418   |
| C13         | -3.35354    | 0.9637   | 0.04654  | H41         | -1.35869    | -2.748   | 1.4835   |
| C14         | -0.12044    | 0.09469  | 4.49455  | H42         | -5.15106    | 1.70748  | -0.76451 |
| C15         | -3.51802    | -0.49043 | 0.18097  | H43         | -2.23582    | 4.61614  | 0.14867  |
| C16         | -1.65031    | 2.63726  | 0.5773   | H44         | -4.41323    | 4.02646  | -0.71083 |
| C17         | 4.34506     | 3.29136  | 0.27289  | H45         | -3.23689    | -4.21742 | 0.98613  |
| C18         | 4.49079     | 2.49133  | -2.00672 | H46         | -5.23911    | -3.33052 | -0.03163 |
| C19         | 4.72715     | -2.55968 | 1.68548  | H47         | 5.97424     | -2.04974 | -0.02778 |
| C20         | 4.64047     | 3.52024  | -1.07348 | H48         | 5.13018     | -4.27402 | -0.48275 |
| C21         | 7.03795     | -2.21441 | 0.15317  | H49         | 2.74441     | -4.66106 | -0.66916 |
| C22         | 5.85387     | -3.34158 | 1.93588  | H50         | 1.19209     | -2.82038 | -0.39197 |
| C23         | 7.00713     | -3.17362 | 1.16715  | H51         | 4.43427     | -0.1947  | 0.23958  |
| C24         | 0.9165      | 0.92996  | -1.95824 | H52         | 2.77312     | 0.95068  | -2.15388 |
| C25         | -3.92745    | 0.44176  | 2.32844  | H53         | 3.8485      | 3.03588  | -2.76027 |
| C26         | 0.91738     | 3.35146  | -1.97233 | H54         | 4.05306     | 4.81677  | -1.12757 |
| C27         | 0.91043     | -2.20319 | 1.92773  | H55         | 3.18812     | 4.52046  | 1.11529  |
| C28         | -4.03308    | -2.30543 | 1.83468  | H56         | 2.09812     | 2.44342  | 1.73526  |
| Au1         | -0.36571    | -0.2719  | -1.01231 | C29         | 2.36143     | 1.5346   | -0.15831 |
| P2          | 1.52747     | -0.01847 | 0.23533  | C30         | 2.86204     | 1.70839  | -1.4589  |
| Cl3         | -1.1373     | -0.65495 | -3.12442 | C31         | 3.47767     | 2.90499  | -1.80613 |
| C4          | -0.41837    | 0.066    | 2.09792  | C32         | 3.59502     | 3.92968  | -0.86624 |
| C5          | -1.3424     | 0.07299  | 0.91482  | C33         | 3.09625     | 3.75997  | 0.42374  |
| C6          | 1.26542     | 0.01752  | 4.33836  | C34         | 2.47409     | 2.56667  | 0.78211  |
| C7          | -2.3321     | -1.01773 | 0.74522  | H35         | 1.87873     | -0.00536 | 5.16803  |

**Table S3.** Cartesian coordinates for compound [4]<sup>+</sup>.

| Atom Number | Coordinates |          |          | Atom Number | Coordinates |          |          |
|-------------|-------------|----------|----------|-------------|-------------|----------|----------|
|             | X           | Y        | Z        |             | X           | Y        | Z        |
| Au1         | -0.23062    | -1.86562 | -0.21016 | C57         | 4.46109     | 2.16609  | -3.30576 |
| Au2         | 0.23062     | 1.86562  | -0.21016 | C58         | -2.28373    | 3.406    | -2.36848 |
| P3          | 1.14753     | -3.66361 | 0.14868  | C59         | -3.74994    | 4.28092  | -0.63774 |
| P4          | -1.14753    | 3.66361  | 0.14868  | C60         | -2.75305    | 2.63198  | 2.16657  |
| Cl5         | -1.60962    | 0.15793  | -0.40904 | C61         | -1.39621    | 4.55312  | 2.78492  |
| Cl6         | 1.60962     | -0.15793 | -0.40904 | C62         | 0.47169     | 7.4087   | -0.13136 |
| C7          | -1.82666    | -3.30221 | -0.16939 | C63         | -3.2952     | 3.57433  | -3.30622 |
| C8          | 2.50771     | -3.76295 | -1.03073 | C64         | -4.75506    | 4.44805  | -1.58645 |
| C9          | -1.83121    | -7.09247 | -0.20724 | C65         | -3.25821    | 2.58092  | 3.46049  |
| C10         | -0.47169    | -7.4087  | -0.13136 | C66         | -1.91287    | 4.4932   | 4.0765   |
| C11         | -2.25595    | -5.76906 | -0.20759 | C67         | -4.52875    | 4.09689  | -2.9158  |
| C12         | -1.32183    | -4.72835 | -0.12635 | C68         | -2.8404     | 3.50976  | 4.41436  |
| C13         | 0.03114     | -5.05749 | -0.02879 | H69         | -2.52838    | -7.85128 | -0.26372 |
| C14         | -2.69777    | -2.86845 | 0.97017  | H70         | -0.1673     | -8.39473 | -0.1425  |
| C15         | 2.28373     | -3.406   | -2.36848 | H71         | -3.26314    | -5.55236 | -0.26791 |
| C16         | 0.46662     | -6.39038 | -0.041   | H72         | 1.37079     | -3.01965 | -2.65537 |
| C17         | -3.87653    | -2.27856 | 0.46852  | H73         | 1.47304     | -6.61138 | 0.01655  |
| C18         | 3.2952      | -3.57433 | -3.30622 | H74         | 3.13412     | -3.31286 | -4.29147 |
| C19         | 3.74994     | -4.28092 | -0.63774 | H75         | 3.91804     | -4.53648 | 0.34789  |
| C20         | 4.75506     | -4.44805 | -1.58645 | H76         | 5.6701      | -4.83302 | -1.30444 |
| C21         | 4.52875     | -4.09689 | -2.9158  | H77         | 5.2771      | -4.2239  | -3.61499 |
| C22         | -4.85304    | -1.81951 | 1.34338  | H78         | -5.7194     | -1.3882  | 0.98503  |
| C23         | -2.49173    | -3.0091  | 2.33896  | H79         | -1.63129    | -3.45003 | 2.69987  |
| C24         | -4.6397     | -1.95302 | 2.71869  | H80         | -5.35559    | -1.61141 | 3.37886  |
| C25         | -3.47385    | -2.54099 | 3.21367  | H81         | -3.33739    | -2.63006 | 4.23272  |
| C26         | -2.34551    | -3.19483 | -2.72621 | H82         | -1.46982    | -3.66563 | -3.00286 |
| C27         | -3.27273    | -2.79227 | -3.68814 | H83         | -3.0792     | -2.95825 | -4.68815 |
| C28         | -4.46109    | -2.16609 | -3.30576 | H84         | -5.13347    | -1.86842 | -4.02987 |
| C29         | -4.75506    | -1.93579 | -1.9588  | H85         | -5.64072    | -1.48291 | -1.68396 |
| C30         | -3.83269    | -2.32797 | -0.99721 | H86         | 3.21963     | -3.4682  | 5.37326  |
| C31         | -2.62689    | -2.94783 | -1.38545 | H87         | 3.94438     | -1.85384 | 3.71651  |
| C32         | 2.8404      | -3.50976 | 4.41436  | H88         | 3.06121     | -1.9441  | 1.46167  |
| C33         | 3.25821     | -2.58092 | 3.46049  | H89         | 0.70411     | -5.27715 | 2.53632  |
| C34         | 2.75305     | -2.63198 | 2.16657  | H90         | 1.60815     | -5.17871 | 4.78519  |
| C35         | 1.8209      | -3.625   | 1.82391  | H91         | 3.33739     | 2.63006  | 4.23272  |
| C36         | 1.39621     | -4.55312 | 2.78492  | H92         | 1.63129     | 3.45003  | 2.69987  |
| C37         | 1.91287     | -4.4932  | 4.0765   | H93         | 5.35559     | 1.61141  | 3.37886  |
| C38         | 3.47385     | 2.54099  | 3.21367  | H94         | 5.7194      | 1.3882   | 0.98503  |
| C39         | 2.49173     | 3.0091   | 2.33896  | H95         | 3.26314     | 5.55236  | -0.26791 |
| C40         | 4.6397      | 1.95302  | 2.71869  | H96         | 1.46982     | 3.66563  | -3.00286 |
| C41         | 2.69777     | 2.86845  | 0.97017  | H97         | 5.64072     | 1.48291  | -1.68396 |
| C42         | 4.85304     | 1.81951  | 1.34338  | H98         | 2.52838     | 7.85128  | -0.26372 |
| C43         | 1.82666     | 3.30221  | -0.16939 | H99         | -1.47304    | 6.61138  | 0.01655  |
| C44         | 3.87653     | 2.27856  | 0.46852  | H100        | 3.0792      | 2.95825  | -4.68815 |
| C45         | 1.32183     | 4.72835  | -0.12635 | H101        | 5.13347     | 1.86842  | -4.02987 |
| C46         | 2.62689     | 2.94783  | -1.38545 | H102        | -1.37079    | 3.01965  | -2.65537 |
| C47         | 3.83269     | 2.32797  | -0.99721 | H103        | -3.91804    | 4.53648  | 0.34789  |
| C48         | 2.25595     | 5.76906  | -0.20759 | H104        | -3.06121    | 1.9441   | 1.46167  |
| C49         | -0.03114    | 5.05749  | -0.02879 | H105        | -0.70411    | 5.27715  | 2.53632  |
| C50         | 2.34551     | 3.19483  | -2.72621 | H106        | 0.1673      | 8.39473  | -0.1425  |
| C51         | 4.75506     | 1.93579  | -1.9588  | H107        | -3.13412    | 3.31286  | -4.29147 |
| C52         | -2.50771    | 3.76295  | -1.03073 | H108        | -5.6701     | 4.83302  | -1.30444 |
| C53         | -1.8209     | 3.625    | 1.82391  | H109        | -3.94438    | 1.85384  | 3.71651  |
| C54         | 1.83121     | 7.09247  | -0.20724 | H110        | -1.60815    | 5.17871  | 4.78519  |
| C55         | -0.46662    | 6.39038  | -0.041   | H111        | -5.2771     | 4.2239   | -3.61499 |
| C56         | 3.27273     | 2.79227  | -3.68814 | H112        | -3.21963    | 3.4682   | 5.37326  |

**Table S4.** Cartesian coordinates for compound  $[4_2]^{2+}$ .

| Atom<br>Number | Coordinates |          |          | Atom<br>Number | Coordinates |          |          |
|----------------|-------------|----------|----------|----------------|-------------|----------|----------|
|                | X           | Y        | Z        |                | X           | Y        | Z        |
| Au1            | -1.48162    | -0.05526 | 0.71206  | C21            | 3.0038      | -2.78196 | 1.64094  |
| P2             | 0.64791     | -0.01054 | -0.18223 | C22            | 3.21576     | -3.72728 | 0.63665  |
| Cl3            | -3.72264    | -0.0826  | 1.0759   | H23            | 0.17545     | 1.92731  | -4.668   |
| C4             | -0.09753    | 1.16211  | -4.03162 | H24            | -1.40619    | 0.25015  | -5.41035 |
| C5             | -1.00635    | 0.19346  | -4.46064 | H25            | -2.0491     | -1.56362 | -3.93668 |
| C6             | -1.37709    | -0.84993 | -3.61407 | H26            | -1.11283    | -1.69705 | -1.70229 |
| C7             | -0.83921    | -0.92732 | -2.3329  | H27            | 1.10355     | 1.82632  | -2.43111 |
| C8             | 0.08077     | 0.04918  | -1.89907 | H28            | -0.11691    | 2.6659   | 0.59445  |
| C9             | 0.44212     | 1.10173  | -2.75129 | H29            | 1.14094     | 4.68889  | 1.0456   |
| C10            | 1.5919      | 1.47041  | 0.2221   | H30            | 3.56307     | 4.6581   | 0.94304  |
| C11            | 0.91399     | 2.65533  | 0.54793  | H31            | 4.73599     | 2.6159   | 0.37845  |
| C12            | 1.63589     | 3.81509  | 0.80787  | H32            | 3.49246     | 0.58397  | -0.07932 |
| C13            | 3.02943     | 3.79678  | 0.74713  | H33            | 0.25692     | -0.07302 | 2.67093  |
| C14            | 3.70497     | 2.62124  | 0.42321  | H34            | -1.16614    | -0.96846 | 3.14651  |
| C15            | 2.99286     | 1.45469  | 0.15998  | H35            | -1.18252    | 0.7785   | 3.1769   |
| C16            | -0.81299    | -0.08288 | 2.66078  | H36            | 1.48245     | -2.27906 | -1.83642 |
| C17            | 1.66796     | -1.47047 | 0.11099  | H37            | 2.07387     | -0.95588 | 2.12668  |
| C18            | 1.89026     | -2.41589 | -0.89834 | H38            | 2.83069     | -4.24046 | -1.36971 |
| C19            | 2.23205     | -1.655   | 1.38423  | H39            | 3.42042     | -2.91977 | 2.575    |
| C20            | 2.66458     | -3.54141 | -0.62893 | H40            | 3.78285     | -4.56702 | 0.83227  |

**Table S5.** Cartesian coordinates for compound  $[\text{Ph}_3\text{P}(\text{Me})\text{AuCl}]^+$ .

| Atom Number | Coordinates |          |          | Atom Number | Coordinates |          |          |
|-------------|-------------|----------|----------|-------------|-------------|----------|----------|
|             | X           | Y        | Z        |             | X           | Y        | Z        |
| Au1         | 1.70476     | -0.70414 | 0.0002   | C41         | 6.63087     | -2.8841  | 0.28187  |
| Au2         | -1.70475    | 0.70416  | -0.00011 | C42         | 7.15441     | -2.94598 | -1.01002 |
| P3          | -3.89596    | -0.12427 | 0.01562  | C43         | 2.43719     | -2.62487 | 0.0354   |
| P4          | 3.89598     | 0.12426  | 0.01554  | C44         | -2.43724    | 2.62487  | 0.03458  |
| Cl5         | -0.58891    | -1.52599 | -0.03524 | H45         | 2.91631     | 0.23724  | -2.73832 |
| Cl6         | 0.58892     | 1.52601  | -0.03595 | H46         | 2.98542     | 2.01431  | -4.4477  |
| C7          | 3.88077     | 1.44786  | -1.21515 | H47         | 4.81387     | 2.90493  | 0.08725  |
| C8          | 3.35267     | 1.20373  | -2.49332 | H48         | 4.86149     | 4.67204  | -1.63537 |
| C9          | 3.38662     | 2.20483  | -3.45687 | H49         | 3.95613     | 4.23285  | -3.90215 |
| C10         | 4.4174      | 2.70349  | -0.90303 | H50         | 5.18806     | 2.34418  | 5.08078  |
| C11         | 4.44191     | 3.69984  | -1.87543 | H51         | 2.81161     | 1.93673  | 4.49757  |
| C12         | 3.93245     | 3.45169  | -3.14807 | H52         | 2.21903     | 0.95961  | 2.31511  |
| C13         | 4.93226     | 1.90945  | 4.11903  | H53         | 6.41593     | 0.74829  | 1.29351  |
| C14         | 3.59667     | 1.6811   | 3.79252  | H54         | 6.98253     | 1.7553   | 3.47021  |
| C15         | 3.26378     | 1.1239   | 2.56194  | H55         | -2.91612    | -0.23843 | -2.73815 |
| C16         | 4.27557     | 0.78468  | 1.65332  | H56         | -4.8142     | -2.90479 | 0.08831  |
| C17         | 5.6221      | 1.01235  | 1.98621  | H57         | -2.21888    | -0.9586  | 2.31544  |
| C18         | 5.94184     | 1.57847  | 3.21607  | H58         | -6.41584    | -0.74779 | 1.29404  |
| C19         | -3.88081    | -1.44833 | -1.21457 | H59         | -2.98542    | -2.0161  | -4.44688 |
| C20         | -4.27546    | -0.78406 | 1.65368  | H60         | -4.86204    | -4.67251 | -1.63366 |
| C21         | -3.35263    | -1.20476 | -2.49281 | H61         | -2.81127    | -1.93489 | 4.49831  |
| C22         | -4.41767    | -2.70376 | -0.90202 | H62         | -6.98227    | -1.75393 | 3.4712   |
| C23         | -3.2636     | -1.12286 | 2.56239  | H63         | -3.95652    | -4.23429 | -3.90057 |
| C24         | -5.62195    | -1.01159 | 1.98677  | H64         | -5.18768    | -2.34217 | 5.08185  |
| C25         | -3.3867     | -2.2062  | -3.456   | H65         | -5.3832     | 0.44053  | -2.46557 |
| C26         | -4.4423     | -3.70047 | -1.87407 | H66         | -5.25918    | 1.89923  | 1.60421  |
| C27         | -3.59638    | -1.67957 | 3.79321  | H67         | -7.11734    | 2.10815  | -2.99613 |
| C28         | -5.94159    | -1.57722 | 3.21689  | H68         | -6.99517    | 3.55776  | 1.05053  |
| C29         | -3.93274    | -3.45286 | -3.14677 | H69         | -7.92639    | 3.67177  | -1.24785 |
| C30         | -4.93194    | -1.90783 | 4.11991  | H70         | 5.38338     | -0.4414  | -2.46541 |
| C31         | -5.18189    | 1.07121  | -0.40142 | H71         | 5.25901     | -1.89878 | 1.60484  |
| C32         | -5.71385    | 1.13258  | -1.69764 | H72         | 7.11743     | -2.10931 | -2.99532 |
| C33         | -5.64581    | 1.95374  | 0.58997  | H73         | 6.99488     | -3.55764 | 1.05178  |
| C34         | -6.69834    | 2.07042  | -1.99522 | H74         | 7.92624     | -3.67245 | -1.2465  |
| C35         | -6.63106    | 2.88401  | 0.28086  | H75         | 3.09466     | -2.76599 | -0.82308 |
| C36         | -7.15452    | 2.94544  | -1.01108 | H76         | 2.97542     | -2.77343 | 0.9727   |
| C37         | 5.18189     | -1.07141 | -0.40108 | H77         | 1.55565     | -3.26591 | -0.01992 |
| C38         | 5.71392     | -1.13323 | -1.69724 | H78         | -3.09469    | 2.76572  | -0.82397 |
| C39         | 5.64567     | -1.95365 | 0.59063  | H79         | -2.97552    | 2.77369  | 0.97181  |
| C40         | 6.69836     | -2.07124 | -1.99446 | H80         | -1.55571    | 3.26592  | -0.0209  |

**Table S6.** Cartesian coordinates for compound  $[(\text{Ph}_3\text{P}(\text{Me})\text{Au}(\mu_2\text{-Cl}))_2]^{2+}$ .



## 4 X-ray diffraction analysis

### 4.1 Experimental details

The crystallographic measurements were performed at 110(2) K using a three circle (Quest; Mo K $\alpha$  radiation,  $\lambda = 0.71073$  Å) and kappa (Venture; Cu K $\alpha$  radiation,  $\lambda = 1.54178$  Å) Bruker-AXS with I $\mu$ S source and a Photon III area detector diffractometer. In each case, a specimen of suitable size and quality was selected and mounted onto a nylon loop and cooled to 110(2) K in a cold nitrogen stream (OXFORD Cryosystems). The data was collected and reduced using Bruker AXS APEX 3 software<sup>5</sup> and solved by direct methods. Semiempirical absorption corrections were applied using SADABS.<sup>6</sup> Subsequent refinement using a difference map on F<sup>2</sup> using the SHELXTL/PC package (version 6.1 & OLEX<sup>2</sup>).<sup>7,8</sup> Thermal parameters were refined anisotropically for all non-hydrogen atoms to convergence. H atoms were added at idealized positions using a riding model. The results of these X-ray measurements are provided as CIF files. CCDC 2172689-2172692 and 2210579 contain the supplementary crystallographic data for this paper.

### 4.2 CCDC numbers

| <b>Compound</b>                                             | <b>CCDC</b> |
|-------------------------------------------------------------|-------------|
| LOH                                                         | 2172689     |
| <b>1</b>                                                    | 2172690     |
| [ <b>2</b> ][BF <sub>4</sub> ]                              | 2172691     |
| <b>3</b>                                                    | 2172692     |
| [ <b>4</b> <sub>2</sub> ][BArF <sub>24</sub> ] <sub>2</sub> | 2210579     |

## 5 References

1. Wilkins, L. C.; Kim, Y.; Litle, E. D.; Gabbai, F. P., Stabilized Carbenium Ions as Latent, Z-type Ligands. *Angew. Chem.* 2008, 120, 4122-4126; **2019**, 58 (50), 18266-18270.
2. Litle, E. D.; Wilkins, L. C.; Gabbai, F. P., Ligand-enforced intimacy between a gold cation and a carbenium ion: Impact on stability and reactivity. *Chemical Science* **2021**, 12 (11), 3929-3936.
3. Lu, T.; Chen, F., Multiwfn: A multifunctional wavefunction analyzer. *Journal of Computational Chemistry* **2012**, 33 (5), 580-592.
4. Hanwell, M. D.; Curtis, D. E.; Loni, D. C.; Vandermeersch, T.; Zurek, E.; Hutchison, G. R., Avogadro: an advanced semantic chemical editor, visualization, and analysis platform. *Journal of Cheminformatics* **2012**, 4 (1), 17.
5. Bruker, **2019**, APEX3 (v2019.1-0), Bruker AXS Inc., Madison, Wisconsin, USA.
6. Sheldrick, G. M., SADABS. University of Göttingen, Germany. **2016**.
7. Sheldrick, G. M., SHELXT - integrated space-group and crystal-structure determination. *Acta Crystallographica Section A* **2015**, 71 (Pt 1), 3-8.
8. Dolomanov, O. V.; Bourhis, L. J.; Gildea, R. J.; Howard, J. A. K.; Puschmann, H., OLEX2: a complete structure solution, refinement and analysis program. *Journal of Applied Crystallography* **2009**, 42 (2), 339-341.
